# Supplementary material for: Isotope Geochemistry of the Shenshuitan Gold Deposit within the Wulonggou Gold Field in the Eastern Kunlun Orogen, Northwest China: Implications for Metallogeny
Source: MDPI journal article supplement (doi:10.3390/min12030339), 2022-03-09
Supplement: s1 [file s1]

# Supplementary Materials: Isotope Geochemistry of the Shenshuitan Gold Deposit within the Wulonggou Gold Field in the Eastern Kunlun Orogen, Northwest China: Implications for Metallogeny

Xuan Zhou, Tong Pan, Qing-Feng Ding \*, Long Cheng, Kai Song, Fei Liu and Yang Gao

**Table S1.** Sample list in the Shenshuitan gold deposit.

| No. | sample name     | rock type                                        | ore subtype | mineral assembly                                                                        | location                             |
|-----|-----------------|--------------------------------------------------|-------------|-----------------------------------------------------------------------------------------|--------------------------------------|
| 1   | XI-3390NCM29-B1 | phyllitic brecciated granite                     | 1           | pyrite, arsenopyrite, quartz, sericite, plagioclase, alkali feldspar                    | The tunnel on Line 29 at Level 3390m |
| 2   | XI-3390NCM29-B2 | phyllitic brecciated granite                     | 1           | pyrite, arsenopyrite, quartz, sericite, plagioclase, alkali feldspar                    | The tunnel on Line 29 at Level 3390m |
| 3   | XI-3390NCM29-B3 | phyllitic brecciated granite                     | 1           | pyrite, arsenopyrite, quartz, sericite, plagioclase, alkali feldspar                    | The tunnel on Line 29 at Level 3390m |
| 4   | XI-3390NCM29-B4 | phyllitic brecciated granite                     | 1           | pyrite, arsenopyrite, quartz, sericite, plagioclase, alkali feldspar                    | The tunnel on Line 29 at Level 3390m |
| 5   | XI-3390NCM29-B5 | quartz calcite vein phyllitic brecciated granite | 3           | pyrite, galena, sphalerite, chalcopyrite, quartz, calcite, plagioclase, alkali feldspar | The tunnel on Line 29 at Level 3390m |
| 6   | XI-3390NCM29-B6 | pyritized slate                                  | 2           | pyrite, arsenopyrite, quartz, sericite, clay                                            | The tunnel on Line 29 at Level 3390m |
| 7   | XI-3390NCM29-B7 | quartz calcite vein phyllitic brecciated granite | 3           | pyrite, galena, sphalerite, chalcopyrite, quartz, calcite, plagioclase, alkali feldspar | The tunnel on Line 29 at Level 3390m |
| 8   | XI-3390NCM27-B1 | phyllitic brecciated granite                     | 1           | pyrite, arsenopyrite, quartz, sericite, plagioclase, alkali feldspar                    | The tunnel on Line 27 at Level 3390m |
| 9   | XI-3390NCM27-B2 | phyllitic brecciated granite                     | 1           | pyrite, arsenopyrite, quartz, sericite, plagioclase, alkali feldspar                    | The tunnel on Line 27 at Level 3390m |
| 10  | XI-3390NCM27-B3 | pyritized slate                                  | 2           | pyrite, arsenopyrite, quartz, sericite, clay                                            | The tunnel on Line 27 at Level 3390m |
| 11  | XI-3390NCM17-B1 | phyllitic brecciated granite                     | 1           | pyrite, arsenopyrite, quartz, sericite, plagioclase, alkali feldspar                    | The tunnel on Line 17 at Level 3390m |
| 12  | XI-3390NCM17-B2 | phyllitic brecciated granite                     | 1           | pyrite, arsenopyrite, quartz, sericite, plagioclase, alkali feldspar                    | The tunnel on Line 17 at Level 3390m |
| 13  | XI-3390NCM11-B1 | phyllitic brecciated granite                     | 1           | pyrite, arsenopyrite, quartz, sericite, plagioclase, alkali feldspar                    | The tunnel on Line 11 at Level 3390m |
| 14  | XI-3390NCM11-B2 | phyllitic brecciated granite                     | 1           | pyrite, arsenopyrite, quartz, sericite, plagioclase, alkali feldspar                    | The tunnel on Line 11 at Level 3390m |
| 15  | XI-3390NCM11-B3 | phyllitic brecciated granite                     | 1           | pyrite, arsenopyrite, quartz, sericite, plagioclase, alkali feldspar                    | The tunnel on Line 11 at Level 3390m |
| 16  | XI-3390NCM7-B1  | phyllitic brecciated granite                     | 1           | pyrite, arsenopyrite, quartz, sericite, plagioclase, alkali feldspar                    | The tunnel on Line 7 at Level 3390m  |
| 17  | XI-3390NCM7-B2  | phyllitic brecciated granite                     | 1           | pyrite, arsenopyrite, quartz, sericite, plagioclase, alkali feldspar                    | The tunnel on Line 7 at Level 3390m  |
| 18  | XI-3390NCM7-B3  | pyritized slate                                  | 2           | pyrite, arsenopyrite, quartz, sericite, clay                                            | The tunnel on Line 7 at Level 3390m  |

**Table S2.** H and O isotope data of quartz and sericites from the Shenshuitan and Hongqigou gold deposits.

| No. | sample name     | rock types     | ore subtype | mineral  | $\delta D_{VSMOW}$ | $\delta^{18}O_{VSMOW}$ | $\delta^{18}D_{H_2O}\text{‰}$ | $\delta^{18}O_{H_2O}\text{‰}$ | average Th (°C) | ore district | references |
|-----|-----------------|----------------|-------------|----------|--------------------|------------------------|-------------------------------|-------------------------------|-----------------|--------------|------------|
| 1   | XI-3390NCM7-B1  | phyllitic rock | 1           | quartz   | −110.6             | 4.6                    | −110.6                        | −3.8                          | 262             | Shenshuitan  | This study |
| 2   | XI-3390NCM7-B2  | phyllitic rock | 1           | quartz   | −112.4             | 10.7                   | −112.4                        | 2.3                           | 262             | Shenshuitan  | This study |
| 3   | XI-3390NCM7-B3  | phyllitic rock | 2           | quartz   | −112.3             | 12.0                   | −112.3                        | 3.6                           | 262             | Shenshuitan  | This study |
| 4   | XI-3390NCM11-B1 | phyllitic rock | 1           | quartz   | −103.6             | 11.2                   | −103.6                        | 2.8                           | 262             | Shenshuitan  | This study |
| 5   | XI-3390NCM11-B3 | phyllitic rock | 1           | quartz   | −113.9             | 11.3                   | −113.9                        | 2.9                           | 262             | Shenshuitan  | This study |
| 6   | XI-3390NCM17-B2 | phyllitic rock | 1           | sericite | −93.1              | 5.5                    | −73.1                         | 0.9                           | 262             | Shenshuitan  | This study |

|    |                 |                |          |        |      |        |     |     |             |                    |
|----|-----------------|----------------|----------|--------|------|--------|-----|-----|-------------|--------------------|
| 7  | XI-SDNCM3-B2-1  | phyllitic rock | sericite | −89.7  | 7.6  | −69.7  | 3.0 | 262 | Shenshuitan | Song 2019          |
| 8  | XI-SDNCM3-B7    | phyllitic rock | sericite | −88.3  | 5.9  | −68.3  | 1.3 | 262 | Shenshuitan | Song 2019          |
| 9  | XI-SDNCM3-B8A   | phyllitic rock | sericite | −94.5  | 5.7  | −74.5  | 1.1 | 262 | Shenshuitan | Song 2019          |
| 10 | WL23-5          | phyllitic rock | quartz   | −87.0  | 15.1 | −87.0  | 6.7 | 262 | Shenshuitan | Zhang et al., 2017 |
| 11 | WL29-5          | phyllitic rock | quartz   | −90.0  | 11.6 | −90.0  | 3.2 | 262 | Shenshuitan | Zhang et al., 2017 |
| 12 | WL26-4-1        | phyllitic rock | quartz   | −107.0 | 11.3 | −107.0 | 2.9 | 262 | Shenshuitan | Zhang et al., 2017 |
| 13 | WL26-4-2        | phyllitic rock | quartz   | −82.0  | 11.7 | −82.0  | 3.3 | 262 | Shenshuitan | Zhang et al., 2017 |
| 14 | WL43-1          | phyllitic rock | quartz   | −97.0  | 10.8 | −97.0  | 2.4 | 262 | Shenshuitan | Zhang et al., 2017 |
| 15 | WL44-1          | phyllitic rock | quartz   | −63.0  | 13.2 | −63.0  | 4.8 | 262 | Shenshuitan | Zhang et al., 2017 |
| 16 | SZDG-ZK9302-OH1 | phyllitic rock | quartz   | −93.6  | 12.0 | −93.6  | 3.6 | 262 | Shenshuitan | Zhang 2018         |
| 17 | SZDG-3270-CO1   | phyllitic rock | quartz   | −97.2  | 11.9 | −97.2  | 3.5 | 262 | Shenshuitan | Zhang 2018         |
| 18 | SZDG-3270-CO4   | phyllitic rock | quartz   | −105.7 | 13.1 | −105.7 | 4.7 | 262 | Shenshuitan | Zhang 2018         |
| 19 | SZDG-3270-CO5   | phyllitic rock | quartz   | −84.6  | 10.1 | −84.6  | 1.7 | 262 | Shenshuitan | Zhang 2018         |
| 20 | SZDG-ZK9302-CO6 | phyllitic rock | quartz   | −98.0  | 11.0 | −98.0  | 2.6 | 262 | Shenshuitan | Zhang 2018         |
| 21 | 337000PD01-B2-Q | quartz vein    | quartz   | −91.1  | 14.7 | −91.1  | 6.2 | 262 | Hongqigou   | Cheng 2020         |
| 22 | 3810PD301-B4-Q  | quartz vein    | quartz   | −80.4  | 13.9 | −80.4  | 5.5 | 262 | Hongqigou   | Cheng 2020         |
| 23 | 3810PD301-B5-Q  | quartz vein    | quartz   | −87.8  | 13.9 | −87.8  | 5.5 | 262 | Hongqigou   | Cheng 2020         |
| 24 | 3810PD301-B7-Q  | quartz vein    | quartz   | −85.5  | 14.4 | −85.5  | 6.0 | 262 | Hongqigou   | Cheng 2020         |
| 25 | 3810PD301-B8-Q  | quartz vein    | quartz   | −121.5 | 12.8 | −121.5 | 4.4 | 262 | Hongqigou   | Cheng 2020         |

**Table S3.** Bulk sulfur isotope data of sulfides from the Shenshuitan and Hongqigou gold deposits.

| No. | sample             | rock type                    | ore subtype | mineral      | $\delta^{34}\text{S}_{\text{CDT}}(\text{‰})$ | $\delta^{34}\text{S}_{\text{H2S}}(\text{‰})$ | ore district | references |
|-----|--------------------|------------------------------|-------------|--------------|----------------------------------------------|----------------------------------------------|--------------|------------|
| 1   | XI-3390NCM11-B1Apy | phyllitic brecciated granite | 1           | arsenopyrite | 1.0                                          |                                              | Shenshuitan  | this study |
| 2   | XI-3390NCM11-B1Po  | phyllitic brecciated granite | 1           | pyrrhotite   | 0.7                                          | 0.4                                          | Shenshuitan  | this study |
| 3   | XI-3390NCM11-B1Py  | phyllitic brecciated granite | 1           | pyrite       | −1.6                                         | −3.0                                         | Shenshuitan  | this study |
| 4   | XI-3390NCM11-B2Apy | phyllitic brecciated granite | 1           | arsenopyrite | 1.3                                          |                                              | Shenshuitan  | this study |
| 5   | XI-3390NCM11-B2Po  | phyllitic brecciated granite | 1           | pyrrhotite   | −0.7                                         | −1.0                                         | Shenshuitan  | this study |
| 6   | XI-3390NCM11-B2Py  | phyllitic brecciated granite | 1           | pyrite       | −0.2                                         | −1.6                                         | Shenshuitan  | this study |
| 7   | XI-3390NCM11-B3Apy | phyllitic brecciated granite | 1           | arsenopyrite | 1.7                                          |                                              | Shenshuitan  | this study |
| 8   | XI-3390NCM11-B3Py  | phyllitic brecciated granite | 1           | pyrite       | 1.3                                          | −0.1                                         | Shenshuitan  | this study |
| 9   | XI-3390NCM17-B1Py  | phyllitic brecciated granite | 1           | pyrite       | −7.3                                         | −8.7                                         | Shenshuitan  | this study |
| 10  | XI-3390NCM17-B2Apy | phyllitic brecciated granite | 1           | arsenopyrite | 0.2                                          |                                              | Shenshuitan  | this study |
| 11  | XI-3390NCM17-B2Po  | phyllitic brecciated granite | 1           | pyrrhotite   | −2.6                                         | −2.9                                         | Shenshuitan  | this study |
| 12  | XI-3390NCM17-B2Py  | phyllitic brecciated granite | 1           | pyrite       | −2.1                                         | −3.5                                         | Shenshuitan  | this study |
| 13  | XI-3390NCM27-B1Py  | phyllitic brecciated granite | 1           | pyrite       | −3.7                                         | −5.1                                         | Shenshuitan  | this study |
| 14  | XI-3390NCM27-B2Apy | phyllitic brecciated granite | 1           | arsenopyrite | 4.9                                          |                                              | Shenshuitan  | this study |
| 15  | XI-3390NCM27-B3Apy | pyritized slate              | 2           | arsenopyrite | 5.4                                          |                                              | Shenshuitan  | this study |
| 16  | XI-3390NCM27-B3Po  | pyritized slate              | 2           | pyrrhotite   | 7.1                                          | 6.8                                          | Shenshuitan  | this study |
| 17  | XI-3390NCM29-B1Po  | phyllitic brecciated granite | 1           | pyrrhotite   | 6.3                                          | 6.0                                          | Shenshuitan  | this study |
| 18  | XI-3390NCM29-B1Py  | phyllitic brecciated granite | 1           | pyrite       | 6.2                                          | 4.8                                          | Shenshuitan  | this study |
| 19  | XI-3390NCM29-B2Apy | phyllitic brecciated granite | 1           | arsenopyrite | 1.8                                          |                                              | Shenshuitan  | this study |
| 20  | XI-3390NCM29-B2Py  | phyllitic brecciated granite | 1           | pyrite       | 3                                            | 1.6                                          | Shenshuitan  | this study |
| 21  | XI-3390NCM29-B3Apy | phyllitic brecciated granite | 1           | arsenopyrite | 0.7                                          |                                              | Shenshuitan  | this study |

|    |                    |                                                     |   |              |     |      |             |                   |
|----|--------------------|-----------------------------------------------------|---|--------------|-----|------|-------------|-------------------|
| 22 | XI-3390NCM29-B3Py  | phyllitic brecciated granite                        | 1 | pyrite       | 0.5 | −0.9 | Shenshuitan | this study        |
| 23 | XI-3390NCM29-B4Apy | phyllitic brecciated granite                        | 1 | arsenopyrite | 1.6 |      | Shenshuitan | this study        |
| 24 | XI-3390NCM29-B4Po  | phyllitic brecciated granite                        | 1 | pyrrhotite   | 0.9 | 0.6  | Shenshuitan | this study        |
| 25 | XI-3390NCM29-B4Py  | phyllitic brecciated granite                        | 1 | pyrite       | 0.3 | −1.1 | Shenshuitan | this study        |
| 26 | XI-3390NCM29-B5Gn  | quartz calcite vein in phyllitic brecciated granite | 3 | galena       | 3.3 | 5.5  | Shenshuitan | this study        |
| 27 | XI-3390NCM29-B5Py  | quartz calcite vein in phyllitic brecciated granite | 3 | pyrite       | 4   | 2.6  | Shenshuitan | this study        |
| 28 | XI-3390NCM29-B5Sp  | quartz calcite vein in phyllitic brecciated granite | 3 | sphalerite   | 4.4 | 4.1  | Shenshuitan | this study        |
| 29 | XI-3390NCM29-B6Po  | pyritized slate                                     | 2 | pyrrhotite   | 8.3 | 8.0  | Shenshuitan | this study        |
| 30 | XI-3390NCM29-B6Py  | pyritized slate                                     | 2 | pyrite       | 9.6 | 8.2  | Shenshuitan | this study        |
| 31 | XI-3390NCM29-B7Gn  | quartz calcite vein in phyllitic brecciated granite | 3 | galena       | 3   | 5.2  | Shenshuitan | this study        |
| 32 | XI-3390NCM29-B7Py  | quartz calcite vein in phyllitic brecciated granite | 3 | pyrite       | 4.4 | 3.0  | Shenshuitan | this study        |
| 33 | XI-3390NCM29-B7Sp  | quartz calcite vein in phyllitic brecciated granite | 3 | sphalerite   | 5.7 | 5.4  | Shenshuitan | this study        |
| 34 | XI-3390NCM7-B1Apy  | phyllitic brecciated granite                        | 1 | arsenopyrite | 2.8 |      | Shenshuitan | this study        |
| 35 | XI-3390NCM7-B1Po   | phyllitic brecciated granite                        | 1 | pyrrhotite   | 3.5 | 3.2  | Shenshuitan | this study        |
| 36 | XI-3390NCM7-B1Py   | phyllitic brecciated granite                        | 1 | pyrite       | 1.9 | 0.5  | Shenshuitan | this study        |
| 37 | XI-3390NCM7-B2Py   | phyllitic brecciated granite                        | 1 | pyrite       | 3.1 | 1.7  | Shenshuitan | this study        |
| 38 | XI-3390NCM7-B3Gn   | pyritized slate                                     | 2 | galena       | 2.8 | 5.0  | Shenshuitan | this study        |
| 39 | XI-3390NCM7-B3Po   | pyritized slate                                     | 2 | pyrrhotite   | 5.8 | 5.5  | Shenshuitan | this study        |
| 40 | XI-3390NCM7-B3Py   | pyritized slate                                     | 2 | pyrite       | 5.4 | 4.0  | Shenshuitan | this study        |
| 41 | XI-3390NCM7-B3Sp   | pyritized slate                                     | 2 | sphalerite   | 6.6 | 6.3  | Shenshuitan | this study        |
| 42 | XI-SDNCM3-B1       | phyllitic rock                                      |   | pyrite       | 4.4 | 3.0  | Shenshuitan | Liu 2017          |
| 43 | XI-SDNCM3-B2-1     | phyllitic rock                                      |   | pyrite       | 3.7 | 2.3  | Shenshuitan | Liu 2017          |
| 44 | XI-SDNCM3-B5       | phyllitic rock                                      |   | pyrite       | 5.4 | 4.0  | Shenshuitan | Liu 2017          |
| 45 | XI-SDNCM3-B7       | phyllitic rock                                      |   | pyrite       | 5.9 | 4.5  | Shenshuitan | Liu 2017          |
| 46 | XI-SDNCM3-B8       | phyllitic rock                                      |   | pyrite       | 4.2 | 2.8  | Shenshuitan | Liu 2017          |
| 47 | HLG-PD3450-19-S3   | phyllitic rock                                      |   | pyrite       | 0.4 | −1.0 | Shenshuitan | Liu 2017          |
| 48 | HLG-PD3450-25-S1   | phyllitic rock                                      |   | pyrite       | 1   | −0.4 | Shenshuitan | Liu 2017          |
| 49 | HLG-PD3450-3-S6    | phyllitic rock                                      |   | pyrite       | 8.5 | 7.1  | Shenshuitan | Liu 2017          |
| 67 | SZDG-ZK9104-S1     | phyllitic rock                                      |   | pyrite       | 4   | 2.6  | Shenshuitan | Liu 2017          |
| 68 | SZDG-ZK9104-S2     | phyllitic rock                                      |   | pyrite       | 4.4 | 3.0  | Shenshuitan | Liu 2017          |
| 69 | SZDG-ZK9302-S2     | phyllitic rock                                      |   | pyrite       | 5.2 | 3.8  | Shenshuitan | Liu 2017          |
| 70 | SZDG-ZK9302-S3     | phyllitic rock                                      |   | pyrite       | 3.8 | 2.4  | Shenshuitan | Liu 2017          |
| 71 | SZDG-ZK9302-S4     | phyllitic rock                                      |   | pyrite       | 3.4 | 2.0  | Shenshuitan | Liu 2017          |
| 50 | WL23-1             | phyllitic rock                                      |   | Pyrite       | 3.6 | 2.2  | Shenshuitan | Zhang et al. 2017 |
| 51 | WL23-1a            | phyllitic rock                                      |   | Pyrite       | 3.4 | 2.0  | Shenshuitan | Zhang et al. 2017 |
| 52 | WL24-3             | phyllitic rock                                      |   | Pyrite       | 4.1 | 2.7  | Shenshuitan | Zhang et al. 2017 |
| 53 | WL25-1             | phyllitic rock                                      |   | arsenopyrite | 2.7 |      | Shenshuitan | Zhang et al. 2017 |
| 54 | WL25-1a            | phyllitic rock                                      |   | arsenopyrite | 2.7 |      | Shenshuitan | Zhang et al. 2017 |
| 55 | WL27-1             | phyllitic rock                                      |   | Pyrite       | 2.3 | 0.9  | Shenshuitan | Zhang et al. 2017 |
| 56 | WL28-1             | phyllitic rock                                      |   | Pyrite       | 1   | −0.4 | Shenshuitan | Zhang et al. 2017 |
| 57 | WL28-2-1           | phyllitic rock                                      |   | arsenopyrite | 3.1 |      | Shenshuitan | Zhang et al. 2017 |
| 58 | WL28-2-2           | phyllitic rock                                      |   | arsenopyrite | 2.7 |      | Shenshuitan | Zhang et al. 2017 |
| 59 | WL29-1             | phyllitic rock                                      |   | Pyrite       | 5   | 3.6  | Shenshuitan | Zhang et al. 2017 |
| 60 | WL30-3             | quartz vein                                         |   | Galena       | 3   | 5.2  | Shenshuitan | Zhang et al. 2017 |

|    |                  |              |        |       |      |             |                   |
|----|------------------|--------------|--------|-------|------|-------------|-------------------|
| 61 | WL30-5           | phyllic rock | Pyrite | 6.9   | 5.5  | Shenshuitan | Zhang et al. 2017 |
| 62 | WL31-1           | phyllic rock | Pyrite | 7.9   | 6.5  | Shenshuitan | Zhang et al. 2017 |
| 63 | WL45-1           | phyllic rock | Pyrite | 5.4   | 4.0  | Shenshuitan | Zhang et al. 2017 |
| 64 | WL43-1           | phyllic rock | Pyrite | 4.8   | 3.4  | Shenshuitan | Zhang et al. 2017 |
| 65 | WL43-1a          | phyllic rock | Pyrite | 5     | 3.6  | Shenshuitan | Zhang et al. 2017 |
| 66 | WL40-1           | quartz vein  | Galena | 3.9   | 6.1  | Shenshuitan | Zhang et al. 2017 |
| 72 | 337000PD01-B2-Py | quartz vein  | pyrite | 11.94 | 10.5 | Hongqigou   | Cheng 2020        |
| 73 | 337000PD01-B3-Py | quartz vein  | pyrite | 10.53 | 9.1  | Hongqigou   | Cheng 2020        |
| 74 | 3810PD301-B1-Py  | quartz vein  | pyrite | 4.50  | 3.1  | Hongqigou   | Cheng 2020        |
| 75 | 3810PD301-B3-Py  | quartz vein  | pyrite | 11.76 | 10.4 | Hongqigou   | Cheng 2020        |
| 76 | 3810PD301-B4-Py  | quartz vein  | pyrite | 11.62 | 10.2 | Hongqigou   | Cheng 2020        |
| 77 | 3810PD301-B5-Py  | quartz vein  | pyrite | 12.87 | 11.5 | Hongqigou   | Cheng 2020        |
| 78 | 3810PD301-B6-Py  | quartz vein  | pyrite | 9.31  | 7.9  | Hongqigou   | Cheng 2020        |
| 79 | 3810PD301-B7-Py  | quartz vein  | pyrite | 12.17 | 10.8 | Hongqigou   | Cheng 2020        |

**Table S4.** In situ multiple sulfur isotope data using SIMS of sulfides from the Shenshuitan gold deposit.

| analysis spot  | sample name    | ore subtype | sulfide phase | $\delta^{33}\text{S}$ | 2s   | $\delta^{34}\text{S}$ | 2s   | $\delta^{36}\text{S}$ | 2s   | $\Delta^{33}\text{S}$ | 2s   | $\Delta^{36}\text{S}$ | 2s   |
|----------------|----------------|-------------|---------------|-----------------------|------|-----------------------|------|-----------------------|------|-----------------------|------|-----------------------|------|
| Mount1_1@01    | XI-3390NCM7-B1 | 1           | pyrite        | 1.38                  | 0.16 | 2.90                  | 0.19 | 5.29                  | 0.99 | -0.11                 | 0.14 | -0.25                 | 0.89 |
| Mount1_1@02    | XI-3390NCM7-B1 | 1           | pyrite        | 2.22                  | 0.19 | 4.46                  | 0.19 | 8.60                  | 0.98 | -0.08                 | 0.18 | 0.07                  | 0.87 |
| Mount1_1@03    | XI-3390NCM7-B1 | 1           | pyrite        | 1.63                  | 0.15 | 3.37                  | 0.19 | 6.55                  | 0.97 | -0.10                 | 0.14 | 0.10                  | 0.86 |
| Mount1_1@04    | XI-3390NCM7-B1 | 1           | pyrite        | 1.64                  | 0.17 | 3.40                  | 0.19 | 6.00                  | 0.97 | -0.11                 | 0.15 | -0.50                 | 0.86 |
| Mount1_1@05    | XI-3390NCM7-B1 | 1           | pyrite        | 2.25                  | 0.16 | 4.25                  | 0.19 | 8.35                  | 0.97 | 0.06                  | 0.15 | 0.22                  | 0.87 |
| Mount1_1@06    | XI-3390NCM7-B1 | 1           | pyrite        | 1.45                  | 0.17 | 2.93                  | 0.19 | 5.59                  | 1.06 | -0.06                 | 0.15 | -0.01                 | 0.96 |
| Mount1_1@07    | XI-3390NCM7-B1 | 1           | pyrite        | 1.85                  | 0.16 | 3.62                  | 0.19 | 6.65                  | 0.98 | -0.01                 | 0.15 | -0.27                 | 0.87 |
| Mount1_1@08    | XI-3390NCM7-B1 | 1           | pyrite        | 1.29                  | 0.16 | 2.72                  | 0.19 | 5.29                  | 0.97 | -0.11                 | 0.14 | 0.09                  | 0.86 |
| Mount1_1@09    | XI-3390NCM7-B1 | 1           | pyrite        | 2.00                  | 0.16 | 3.86                  | 0.19 | 7.21                  | 1.02 | 0.01                  | 0.15 | -0.18                 | 0.92 |
| Mount1_1@10    | XI-3390NCM7-B1 | 1           | pyrite        | 2.15                  | 0.16 | 4.19                  | 0.19 | 7.92                  | 0.97 | -0.01                 | 0.14 | -0.09                 | 0.86 |
| Mount1_2@01    | XI-3390NCM7-B1 | 1           | pyrite        | 1.27                  | 0.17 | 2.70                  | 0.19 | 4.56                  | 0.96 | -0.12                 | 0.15 | -0.59                 | 0.86 |
| Mount1_2@02    | XI-3390NCM7-B1 | 1           | pyrite        | 1.32                  | 0.15 | 2.59                  | 0.19 | 4.43                  | 0.96 | -0.02                 | 0.14 | -0.52                 | 0.85 |
| Mount1_2@03    | XI-3390NCM7-B1 | 1           | pyrite        | 2.03                  | 0.16 | 4.14                  | 0.18 | 7.53                  | 0.96 | -0.10                 | 0.14 | -0.39                 | 0.85 |
| Mount1_2@04    | XI-3390NCM7-B1 | 1           | pyrite        | 2.12                  | 0.17 | 4.13                  | 0.19 | 7.34                  | 0.97 | 0.00                  | 0.16 | -0.56                 | 0.86 |
| Mount1_2@05    | XI-3390NCM7-B1 | 1           | pyrite        | 1.85                  | 0.17 | 3.74                  | 0.19 | 7.00                  | 0.96 | -0.08                 | 0.15 | -0.15                 | 0.85 |
| Mount1_2@06    | XI-3390NCM7-B1 | 1           | pyrite        | 1.95                  | 0.15 | 3.87                  | 0.18 | 6.84                  | 0.96 | -0.04                 | 0.14 | -0.57                 | 0.85 |
| Mount1_2@07    | XI-3390NCM7-B1 | 1           | pyrite        | 1.96                  | 0.16 | 3.79                  | 0.19 | 6.73                  | 0.96 | 0.01                  | 0.14 | -0.53                 | 0.85 |
| Mount1_2@08    | XI-3390NCM7-B1 | 1           | pyrite        | 2.14                  | 0.15 | 4.19                  | 0.18 | 8.29                  | 0.96 | -0.02                 | 0.14 | 0.27                  | 0.85 |
| Mount1_2@09    | XI-3390NCM7-B1 | 1           | pyrite        | 2.13                  | 0.17 | 4.29                  | 0.19 | 7.95                  | 0.96 | -0.08                 | 0.16 | -0.26                 | 0.85 |
| Mount1_2@10    | XI-3390NCM7-B1 | 1           | pyrite        | 2.21                  | 0.16 | 4.28                  | 0.18 | 7.86                  | 0.96 | 0.01                  | 0.15 | -0.33                 | 0.85 |
| Mount1_2@11    | XI-3390NCM7-B1 | 1           | pyrite        | 1.35                  | 0.15 | 2.58                  | 0.18 | 4.46                  | 0.99 | 0.03                  | 0.14 | -0.48                 | 0.88 |
| Mount1_2@12    | XI-3390NCM7-B1 | 1           | pyrite        | 1.37                  | 0.16 | 2.63                  | 0.18 | 4.59                  | 0.95 | 0.01                  | 0.14 | -0.44                 | 0.84 |
| Mount1_2@13    | XI-3390NCM7-B1 | 1           | pyrite        | 2.05                  | 0.15 | 4.01                  | 0.18 | 8.17                  | 1.03 | -0.01                 | 0.14 | 0.49                  | 0.93 |
| Mount1_2@14    | XI-3390NCM7-B1 | 1           | pyrite        | 1.30                  | 0.15 | 2.61                  | 0.19 | 4.83                  | 0.95 | -0.05                 | 0.14 | -0.17                 | 0.84 |
| Mount1_2@15    | XI-3390NCM7-B1 | 1           | pyrite        | 1.63                  | 0.17 | 3.15                  | 0.18 | 5.39                  | 0.95 | 0.01                  | 0.16 | -0.64                 | 0.84 |
| Mount1_3@01    | XI-3390NCM7-B1 | 1           | pyrite        | 1.87                  | 0.16 | 3.80                  | 0.18 | 7.01                  | 0.95 | -0.09                 | 0.14 | -0.25                 | 0.84 |
| Mount1_3@02    | XI-3390NCM7-B1 | 1           | pyrite        | 1.96                  | 0.16 | 4.05                  | 0.18 | 7.83                  | 0.95 | -0.12                 | 0.14 | 0.07                  | 0.84 |
| Mount1_3@04    | XI-3390NCM7-B1 | 1           | pyrite        | 1.54                  | 0.15 | 3.04                  | 0.19 | 5.34                  | 0.97 | -0.03                 | 0.14 | -0.47                 | 0.87 |
| Mount1_3@05    | XI-3390NCM7-B1 | 1           | pyrite        | 2.21                  | 0.15 | 4.31                  | 0.18 | 7.78                  | 0.95 | -0.01                 | 0.14 | -0.47                 | 0.84 |
| Mount1_3@06    | XI-3390NCM7-B1 | 1           | pyrite        | 1.84                  | 0.17 | 3.74                  | 0.18 | 6.78                  | 0.95 | -0.09                 | 0.15 | -0.37                 | 0.84 |
| Mount1_3@07    | XI-3390NCM7-B1 | 1           | pyrite        | 1.73                  | 0.15 | 3.28                  | 0.18 | 5.70                  | 0.95 | 0.04                  | 0.14 | -0.57                 | 0.84 |
| Mount1_3@08    | XI-3390NCM7-B1 | 1           | pyrite        | 1.74                  | 0.15 | 3.40                  | 0.18 | 5.86                  | 0.95 | -0.01                 | 0.14 | -0.64                 | 0.84 |
| Mount1_3@09    | XI-3390NCM7-B1 | 1           | pyrite        | 1.64                  | 0.15 | 3.30                  | 0.18 | 6.54                  | 0.96 | -0.06                 | 0.13 | 0.22                  | 0.85 |
| Mount1_3@10    | XI-3390NCM7-B1 | 1           | pyrite        | 1.55                  | 0.16 | 3.12                  | 0.18 | 6.34                  | 0.98 | -0.05                 | 0.14 | 0.38                  | 0.88 |
| Mount1_3@11    | XI-3390NCM7-B1 | 1           | pyrite        | 1.41                  | 0.17 | 2.84                  | 0.18 | 5.40                  | 0.95 | -0.06                 | 0.16 | -0.04                 | 0.83 |
| Mount1_3@12    | XI-3390NCM7-B1 | 1           | pyrite        | 1.18                  | 0.16 | 2.53                  | 0.18 | 5.06                  | 1.05 | -0.12                 | 0.14 | 0.23                  | 0.95 |
| Mount1_3@13    | XI-3390NCM7-B1 | 1           | pyrite        | 1.35                  | 0.16 | 2.82                  | 0.18 | 5.20                  | 0.98 | -0.09                 | 0.14 | -0.19                 | 0.87 |
| Mount1_3@14    | XI-3390NCM7-B1 | 1           | pyrite        | 1.28                  | 0.17 | 2.83                  | 0.18 | 5.21                  | 0.95 | -0.18                 | 0.16 | -0.19                 | 0.83 |
| Mount1_3@15    | XI-3390NCM7-B1 | 1           | pyrite        | 1.48                  | 0.15 | 3.02                  | 0.18 | 5.61                  | 0.95 | -0.07                 | 0.14 | -0.16                 | 0.83 |
| Mount1_3_po@16 | XI-3390NCM7-B1 | 1           | pyrrhotite    | 1.75                  | 0.20 | 3.28                  | 0.25 | 6.61                  | 0.98 | 0.06                  | 0.19 | 0.33                  | 0.99 |
| Mount1_3_po@17 | XI-3390NCM7-B1 | 1           | pyrrhotite    | 1.54                  | 0.19 | 3.08                  | 0.24 | 6.13                  | 0.99 | -0.05                 | 0.18 | 0.25                  | 1.00 |
| Mount1_3_po@18 | XI-3390NCM7-B1 | 1           | pyrrhotite    | 1.55                  | 0.20 | 2.96                  | 0.24 | 5.42                  | 0.97 | 0.02                  | 0.20 | -0.25                 | 0.99 |
| Mount1_3_po@19 | XI-3390NCM7-B1 | 1           | pyrrhotite    | 1.44                  | 0.19 | 3.02                  | 0.24 | 6.47                  | 0.98 | -0.12                 | 0.19 | 0.69                  | 1.00 |
| Mount1_3_po@20 | XI-3390NCM7-B1 | 1           | pyrrhotite    | 1.56                  | 0.22 | 3.01                  | 0.25 | 5.84                  | 1.08 | 0.01                  | 0.22 | 0.09                  | 1.09 |

|                |                |   |            |      |      |      |      |       |      |       |      |       |      |
|----------------|----------------|---|------------|------|------|------|------|-------|------|-------|------|-------|------|
| Mount1_4@01    | XI-3390NCM7-B1 | 1 | pyrite     | 1.85 | 0.16 | 3.69 | 0.18 | 6.86  | 0.95 | −0.05 | 0.14 | −0.20 | 0.84 |
| Mount1_4@02    | XI-3390NCM7-B1 | 1 | pyrite     | 2.21 | 0.17 | 4.39 | 0.18 | 8.57  | 1.00 | −0.05 | 0.16 | 0.17  | 0.90 |
| Mount1_4@03    | XI-3390NCM7-B1 | 1 | pyrite     | 1.93 | 0.15 | 3.83 | 0.18 | 7.36  | 0.96 | −0.04 | 0.14 | 0.04  | 0.85 |
| Mount1_4@04    | XI-3390NCM7-B1 | 1 | pyrite     | 2.04 | 0.16 | 3.90 | 0.18 | 7.37  | 0.95 | 0.03  | 0.14 | −0.09 | 0.84 |
| Mount1_4@05    | XI-3390NCM7-B1 | 1 | pyrite     | 1.89 | 0.15 | 3.84 | 0.18 | 6.75  | 0.95 | −0.09 | 0.14 | −0.61 | 0.83 |
| Mount1_4@06    | XI-3390NCM7-B1 | 1 | pyrite     | 1.91 | 0.17 | 3.71 | 0.18 | 7.51  | 0.95 | 0.01  | 0.16 | 0.42  | 0.84 |
| Mount1_4@07    | XI-3390NCM7-B1 | 1 | pyrite     | 1.91 | 0.15 | 3.62 | 0.18 | 7.05  | 0.95 | 0.05  | 0.14 | 0.12  | 0.84 |
| Mount1_4@08    | XI-3390NCM7-B1 | 1 | pyrite     | 1.52 | 0.15 | 3.00 | 0.18 | 5.31  | 0.95 | −0.03 | 0.13 | −0.44 | 0.83 |
| Mount1_4@09    | XI-3390NCM7-B1 | 1 | pyrite     | 1.58 | 0.16 | 3.37 | 0.18 | 5.78  | 0.95 | −0.15 | 0.15 | −0.66 | 0.84 |
| Mount1_4@10    | XI-3390NCM7-B1 | 1 | pyrite     | 1.34 | 0.15 | 2.67 | 0.19 | 5.14  | 0.95 | −0.03 | 0.14 | 0.03  | 0.84 |
| Mount1_4_po@11 | XI-3390NCM7-B1 | 1 | pyrrhotite | 1.55 | 0.19 | 2.72 | 0.25 | 5.26  | 0.98 | 0.15  | 0.19 | 0.05  | 1.01 |
| Mount1_4_po@12 | XI-3390NCM7-B1 | 1 | pyrrhotite | 1.42 | 0.20 | 2.98 | 0.24 | 5.71  | 0.98 | −0.11 | 0.19 | 0.01  | 1.00 |
| Mount1_4_po@13 | XI-3390NCM7-B1 | 1 | pyrrhotite | 1.52 | 0.20 | 3.01 | 0.24 | 5.41  | 1.03 | −0.03 | 0.19 | −0.34 | 1.04 |
| Mount1_4_po@14 | XI-3390NCM7-B1 | 1 | pyrrhotite | 1.11 | 0.19 | 2.35 | 0.24 | 4.51  | 1.07 | −0.10 | 0.19 | 0.02  | 1.08 |
| Mount1_4_po@15 | XI-3390NCM7-B1 | 1 | pyrrhotite | 1.29 | 0.19 | 2.52 | 0.24 | 4.99  | 1.00 | −0.01 | 0.19 | 0.16  | 1.02 |
| Mount1_5@01    | XI-3390NCM7-B3 | 2 | pyrite     | 2.73 | 0.17 | 5.26 | 0.18 | 9.81  | 0.95 | 0.03  | 0.15 | −0.25 | 0.84 |
| Mount1_5@02    | XI-3390NCM7-B3 | 2 | pyrite     | 2.81 | 0.15 | 5.73 | 0.19 | 11.11 | 0.95 | −0.13 | 0.14 | 0.13  | 0.84 |
| Mount1_5@03    | XI-3390NCM7-B3 | 2 | pyrite     | 2.36 | 0.15 | 4.66 | 0.18 | 9.34  | 0.95 | −0.04 | 0.14 | 0.42  | 0.84 |
| Mount1_5@04    | XI-3390NCM7-B3 | 2 | pyrite     | 2.07 | 0.15 | 4.23 | 0.19 | 7.11  | 0.95 | −0.11 | 0.14 | −0.99 | 0.84 |
| Mount1_5@05    | XI-3390NCM7-B3 | 2 | pyrite     | 2.70 | 0.16 | 5.22 | 0.18 | 9.35  | 0.95 | 0.01  | 0.14 | −0.65 | 0.84 |
| Mount1_5@06    | XI-3390NCM7-B3 | 2 | pyrite     | 2.56 | 0.16 | 5.02 | 0.18 | 9.49  | 0.96 | −0.02 | 0.14 | −0.11 | 0.85 |
| Mount1_5@07    | XI-3390NCM7-B3 | 2 | pyrite     | 2.40 | 0.17 | 4.83 | 0.18 | 9.26  | 0.95 | −0.09 | 0.15 | 0.01  | 0.84 |
| Mount1_5@08    | XI-3390NCM7-B3 | 2 | pyrite     | 2.33 | 0.16 | 4.60 | 0.18 | 9.12  | 0.96 | −0.04 | 0.15 | 0.31  | 0.85 |
| Mount1_5@09    | XI-3390NCM7-B3 | 2 | pyrite     | 2.26 | 0.15 | 4.43 | 0.19 | 8.54  | 0.95 | −0.02 | 0.14 | 0.06  | 0.84 |
| Mount1_5@10    | XI-3390NCM7-B3 | 2 | pyrite     | 2.41 | 0.15 | 4.77 | 0.19 | 8.51  | 0.95 | −0.04 | 0.14 | −0.61 | 0.84 |
| Mount1_5_po@11 | XI-3390NCM7-B3 | 2 | pyrrhotite | 1.70 | 0.21 | 3.50 | 0.24 | 6.40  | 0.98 | −0.11 | 0.20 | −0.30 | 0.99 |
| Mount1_5_po@12 | XI-3390NCM7-B3 | 2 | pyrrhotite | 1.58 | 0.19 | 2.99 | 0.27 | 5.94  | 0.98 | 0.04  | 0.20 | 0.21  | 1.02 |
| Mount1_5_po@13 | XI-3390NCM7-B3 | 2 | pyrrhotite | 1.89 | 0.19 | 3.75 | 0.24 | 6.72  | 1.00 | −0.04 | 0.19 | −0.45 | 1.01 |
| Mount1_5_po@14 | XI-3390NCM7-B3 | 2 | pyrrhotite | 2.09 | 0.20 | 3.97 | 0.25 | 7.76  | 0.99 | 0.05  | 0.20 | 0.17  | 1.01 |
| Mount1_5_po@15 | XI-3390NCM7-B3 | 2 | pyrrhotite | 2.21 | 0.19 | 4.18 | 0.25 | 8.19  | 0.98 | 0.06  | 0.18 | 0.18  | 1.00 |
| Mount1_5_po@16 | XI-3390NCM7-B3 | 2 | pyrrhotite | 1.88 | 0.19 | 3.68 | 0.25 | 6.77  | 0.99 | −0.02 | 0.19 | −0.26 | 1.01 |
| Mount1_5_po@17 | XI-3390NCM7-B3 | 2 | pyrrhotite | 2.01 | 0.19 | 3.95 | 0.24 | 7.33  | 1.06 | −0.02 | 0.18 | −0.22 | 1.07 |
| Mount1_5_po@18 | XI-3390NCM7-B3 | 2 | pyrrhotite | 2.23 | 0.20 | 4.20 | 0.24 | 8.06  | 0.98 | 0.06  | 0.19 | 0.02  | 0.99 |
| Mount1_5_po@19 | XI-3390NCM7-B3 | 2 | pyrrhotite | 2.27 | 0.20 | 4.24 | 0.24 | 7.77  | 0.98 | 0.09  | 0.20 | −0.34 | 1.00 |
| Mount1_5_po@20 | XI-3390NCM7-B3 | 2 | pyrrhotite | 1.87 | 0.20 | 3.56 | 0.25 | 6.57  | 0.98 | 0.04  | 0.19 | −0.25 | 0.99 |
| Mount1_5_po@21 | XI-3390NCM7-B3 | 2 | pyrrhotite | 2.18 | 0.21 | 4.33 | 0.25 | 8.31  | 1.08 | −0.04 | 0.21 | 0.03  | 1.10 |
| Mount1_5_po@22 | XI-3390NCM7-B3 | 2 | pyrrhotite | 2.01 | 0.21 | 3.88 | 0.26 | 7.17  | 0.99 | 0.01  | 0.21 | −0.24 | 1.02 |
| Mount1_5_po@23 | XI-3390NCM7-B3 | 2 | pyrrhotite | 2.20 | 0.19 | 4.08 | 0.24 | 7.31  | 0.99 | 0.10  | 0.18 | −0.50 | 1.00 |
| Mount1_5_po@24 | XI-3390NCM7-B3 | 2 | pyrrhotite | 1.90 | 0.19 | 3.95 | 0.24 | 6.81  | 1.02 | −0.13 | 0.19 | −0.75 | 1.03 |
| Mount1_5_po@25 | XI-3390NCM7-B3 | 2 | pyrrhotite | 2.00 | 0.21 | 3.64 | 0.26 | 6.96  | 0.99 | 0.13  | 0.21 | −0.01 | 1.02 |
| Mount1_5_po@26 | XI-3390NCM7-B3 | 2 | pyrrhotite | 2.16 | 0.19 | 3.99 | 0.25 | 6.64  | 0.99 | 0.11  | 0.19 | −0.99 | 1.01 |
| Mount1_5_po@27 | XI-3390NCM7-B3 | 2 | pyrrhotite | 2.15 | 0.19 | 3.97 | 0.24 | 7.14  | 1.09 | 0.11  | 0.19 | −0.45 | 1.10 |
| Mount1_5_po@28 | XI-3390NCM7-B3 | 2 | pyrrhotite | 2.09 | 0.20 | 4.24 | 0.24 | 7.83  | 0.99 | −0.09 | 0.19 | −0.28 | 1.00 |
| Mount1_5_po@29 | XI-3390NCM7-B3 | 2 | pyrrhotite | 2.06 | 0.22 | 3.79 | 0.24 | 6.57  | 0.99 | 0.11  | 0.21 | −0.69 | 1.00 |
| Mount1_5_po@30 | XI-3390NCM7-B3 | 2 | pyrrhotite | 1.91 | 0.20 | 3.95 | 0.25 | 7.40  | 0.99 | −0.12 | 0.19 | −0.16 | 1.01 |
| Mount1_6@01    | XI-3390NCM7-B3 | 2 | pyrite     | 2.43 | 0.16 | 4.85 | 0.18 | 9.11  | 0.96 | −0.06 | 0.15 | −0.18 | 0.85 |
| Mount1_6@02    | XI-3390NCM7-B3 | 2 | pyrite     | 2.88 | 0.15 | 5.48 | 0.18 | 10.45 | 0.96 | 0.06  | 0.14 | −0.05 | 0.85 |
| Mount1_6@03    | XI-3390NCM7-B3 | 2 | pyrite     | 2.51 | 0.17 | 4.80 | 0.21 | 8.56  | 0.96 | 0.04  | 0.17 | −0.63 | 0.87 |
| Mount1_6@04    | XI-3390NCM7-B3 | 2 | pyrite     | 2.82 | 0.16 | 5.43 | 0.19 | 10.14 | 0.96 | 0.03  | 0.14 | −0.25 | 0.85 |
| Mount1_6@05    | XI-3390NCM7-B3 | 2 | pyrite     | 2.28 | 0.15 | 4.68 | 0.18 | 8.62  | 0.99 | −0.13 | 0.14 | −0.35 | 0.88 |
| Mount1_6@06    | XI-3390NCM7-B3 | 2 | pyrite     | 2.70 | 0.15 | 5.30 | 0.19 | 9.83  | 0.96 | −0.03 | 0.14 | −0.32 | 0.85 |
| Mount1_6@07    | XI-3390NCM7-B3 | 2 | pyrite     | 2.40 | 0.15 | 4.79 | 0.18 | 8.48  | 0.97 | −0.06 | 0.14 | −0.70 | 0.86 |
| Mount1_6@08    | XI-3390NCM7-B3 | 2 | pyrite     | 2.67 | 0.15 | 5.23 | 0.19 | 9.60  | 0.96 | −0.02 | 0.14 | −0.41 | 0.86 |
| Mount1_6@09    | XI-3390NCM7-B3 | 2 | pyrite     | 2.23 | 0.16 | 4.51 | 0.19 | 8.80  | 0.96 | −0.09 | 0.14 | 0.17  | 0.86 |
| Mount1_6@10    | XI-3390NCM7-B3 | 2 | pyrite     | 2.29 | 0.17 | 4.49 | 0.20 | 8.24  | 0.96 | −0.02 | 0.16 | −0.36 | 0.87 |
| Mount1_6@11    | XI-3390NCM7-B3 | 2 | pyrite     | 2.83 | 0.16 | 5.56 | 0.18 | 10.49 | 1.04 | −0.03 | 0.15 | −0.16 | 0.94 |
| Mount1_6@12    | XI-3390NCM7-B3 | 2 | pyrite     | 2.33 | 0.16 | 4.57 | 0.19 | 8.66  | 0.96 | −0.02 | 0.14 | −0.09 | 0.86 |
| Mount1_6@13    | XI-3390NCM7-B3 | 2 | pyrite     | 2.42 | 0.15 | 4.53 | 0.19 | 8.45  | 0.97 | 0.09  | 0.14 | −0.23 | 0.86 |
| Mount1_6@14    | XI-3390NCM7-B3 | 2 | pyrite     | 2.73 | 0.16 | 5.39 | 0.19 | 9.77  | 0.97 | −0.04 | 0.15 | −0.54 | 0.87 |
| Mount1_6@15    | XI-3390NCM7-B3 | 2 | pyrite     | 2.20 | 0.17 | 4.12 | 0.20 | 7.22  | 1.04 | 0.09  | 0.16 | −0.66 | 0.95 |
| Mount1_6@16    | XI-3390NCM7-B3 | 2 | pyrite     | 2.49 | 0.15 | 4.69 | 0.20 | 8.91  | 0.97 | 0.08  | 0.14 | −0.07 | 0.87 |
| Mount1_6@17    | XI-3390NCM7-B3 | 2 | pyrite     | 2.29 | 0.17 | 4.51 | 0.19 | 8.58  | 0.97 | −0.03 | 0.16 | −0.05 | 0.86 |
| Mount1_6@18    | XI-3390NCM7-B3 | 2 | pyrite     | 2.86 | 0.16 | 5.70 | 0.19 | 9.70  | 0.97 | −0.07 | 0.15 | −1.21 | 0.86 |
| Mount1_6@19    | XI-3390NCM7-B3 | 2 | pyrite     | 2.70 | 0.15 | 5.18 | 0.19 | 10.14 | 0.97 | 0.03  | 0.14 | 0.21  | 0.87 |

|                |                 |   |            |       |      |       |      |       |      |       |      |       |      |
|----------------|-----------------|---|------------|-------|------|-------|------|-------|------|-------|------|-------|------|
| Mount1_6@20    | XI-3390NCM7-B3  | 2 | pyrite     | 2.57  | 0.15 | 4.98  | 0.19 | 9.41  | 0.97 | 0.00  | 0.14 | -0.13 | 0.86 |
| Mount2_1@01    | XI-3390NCM11-B2 | 1 | pyrite     | 0.25  | 0.14 | 0.47  | 0.19 | -0.12 | 1.00 | 0.00  | 0.14 | -1.03 | 0.95 |
| Mount2_1@02    | XI-3390NCM11-B2 | 1 | pyrite     | -0.06 | 0.14 | 0.11  | 0.19 | -0.74 | 0.98 | -0.12 | 0.13 | -0.95 | 0.93 |
| Mount2_1@03    | XI-3390NCM11-B2 | 1 | pyrite     | 0.41  | 0.15 | 0.86  | 0.19 | 0.34  | 1.01 | -0.03 | 0.14 | -1.30 | 0.96 |
| Mount2_1@04    | XI-3390NCM11-B2 | 1 | pyrite     | 0.00  | 0.14 | 0.13  | 0.19 | 0.28  | 0.98 | -0.06 | 0.13 | 0.04  | 0.92 |
| Mount2_1@05    | XI-3390NCM11-B2 | 1 | pyrite     | 0.09  | 0.14 | 0.22  | 0.19 | -0.55 | 0.98 | -0.02 | 0.14 | -0.97 | 0.92 |
| Mount2_1_po@07 | XI-3390NCM11-B2 | 1 | pyrrhotite | 0.30  | 0.22 | 0.58  | 0.23 | 0.93  | 1.04 | 0.00  | 0.18 | -0.18 | 0.99 |
| Mount2_1_po@08 | XI-3390NCM11-B2 | 1 | pyrrhotite | 0.25  | 0.23 | 0.65  | 0.23 | 1.09  | 1.00 | -0.08 | 0.20 | -0.15 | 0.95 |
| Mount2_1_po@09 | XI-3390NCM11-B2 | 1 | pyrrhotite | 0.36  | 0.23 | 0.52  | 0.23 | 0.60  | 1.00 | 0.09  | 0.20 | -0.40 | 0.95 |
| Mount2_1_po@10 | XI-3390NCM11-B2 | 1 | pyrrhotite | 0.39  | 0.22 | 0.65  | 0.24 | 1.20  | 1.00 | 0.05  | 0.18 | -0.04 | 0.95 |
| Mount2_2@01    | XI-3390NCM11-B2 | 1 | pyrite     | 0.10  | 0.14 | 0.36  | 0.18 | -0.11 | 0.98 | -0.08 | 0.13 | -0.80 | 0.92 |
| Mount2_2@02    | XI-3390NCM11-B2 | 1 | pyrite     | 0.00  | 0.15 | -0.06 | 0.18 | -0.77 | 0.96 | 0.03  | 0.14 | -0.66 | 0.89 |
| Mount2_2@03    | XI-3390NCM11-B2 | 1 | pyrite     | 0.22  | 0.14 | 0.33  | 0.18 | -0.39 | 0.95 | 0.05  | 0.13 | -1.02 | 0.89 |
| Mount2_2@04    | XI-3390NCM11-B2 | 1 | pyrite     | 0.09  | 0.15 | 0.14  | 0.18 | -1.01 | 0.95 | 0.02  | 0.15 | -1.27 | 0.89 |
| Mount2_2@05    | XI-3390NCM11-B2 | 1 | pyrite     | 0.44  | 0.13 | 0.88  | 0.19 | 0.62  | 0.96 | -0.01 | 0.13 | -1.06 | 0.90 |
| Mount2_2_po@06 | XI-3390NCM11-B2 | 1 | pyrrhotite | 0.28  | 0.22 | 0.56  | 0.23 | 0.92  | 0.98 | -0.01 | 0.19 | -0.15 | 0.93 |
| Mount2_2_po@07 | XI-3390NCM11-B2 | 1 | pyrrhotite | 0.50  | 0.23 | 0.91  | 0.23 | 1.77  | 0.98 | 0.04  | 0.19 | 0.03  | 0.92 |
| Mount2_2_po@08 | XI-3390NCM11-B2 | 1 | pyrrhotite | 0.55  | 0.22 | 0.82  | 0.23 | 2.34  | 0.98 | 0.13  | 0.19 | 0.77  | 0.93 |
| Mount2_2_po@09 | XI-3390NCM11-B2 | 1 | pyrrhotite | 0.51  | 0.22 | 0.98  | 0.23 | 0.88  | 0.98 | 0.00  | 0.19 | -0.99 | 0.92 |
| Mount2_2_po@10 | XI-3390NCM11-B2 | 1 | pyrrhotite | 0.54  | 0.24 | 0.84  | 0.23 | 1.23  | 1.00 | 0.11  | 0.21 | -0.36 | 0.95 |
| Mount2_3@02    | XI-3390NCM27-B1 | 1 | pyrite     | -1.67 | 0.14 | -3.32 | 0.18 | -6.97 | 0.94 | 0.04  | 0.13 | -0.65 | 0.88 |
| Mount2_3@03    | XI-3390NCM27-B1 | 1 | pyrite     | -1.79 | 0.14 | -3.44 | 0.18 | -7.52 | 0.94 | -0.02 | 0.13 | -0.96 | 0.88 |
| Mount2_3@04    | XI-3390NCM27-B1 | 1 | pyrite     | -1.59 | 0.13 | -2.98 | 0.18 | -6.51 | 0.94 | -0.05 | 0.12 | -0.82 | 0.88 |
| Mount2_3@05    | XI-3390NCM27-B1 | 1 | pyrite     | -1.62 | 0.14 | -3.13 | 0.18 | -6.12 | 0.94 | -0.01 | 0.14 | -0.15 | 0.88 |
| Mount2_4@01    | XI-3390NCM27-B1 | 1 | pyrite     | -1.70 | 0.14 | -3.14 | 0.18 | -6.47 | 0.97 | -0.08 | 0.14 | -0.47 | 0.91 |
| Mount2_4@02    | XI-3390NCM27-B1 | 1 | pyrite     | -1.70 | 0.15 | -3.22 | 0.18 | -6.96 | 0.95 | -0.04 | 0.14 | -0.82 | 0.88 |
| Mount2_4@03    | XI-3390NCM27-B1 | 1 | pyrite     | -1.99 | 0.15 | -3.92 | 0.18 | -8.16 | 0.95 | 0.03  | 0.14 | -0.68 | 0.88 |
| Mount2_4@04    | XI-3390NCM27-B1 | 1 | pyrite     | -1.64 | 0.14 | -3.26 | 0.18 | -5.50 | 0.95 | 0.04  | 0.13 | 0.72  | 0.89 |
| Mount2_4@05    | XI-3390NCM27-B1 | 1 | pyrite     | -1.87 | 0.13 | -3.60 | 0.18 | -7.77 | 0.95 | -0.01 | 0.13 | -0.90 | 0.89 |
| Mount2_4@06    | XI-3390NCM27-B1 | 1 | pyrite     | -1.98 | 0.14 | -3.84 | 0.18 | -7.39 | 0.95 | -0.01 | 0.14 | -0.07 | 0.89 |
| Mount2_4@07    | XI-3390NCM27-B1 | 1 | pyrite     | -1.68 | 0.13 | -3.19 | 0.18 | -7.21 | 0.95 | -0.04 | 0.13 | -1.12 | 0.89 |
| Mount2_4@08    | XI-3390NCM27-B1 | 1 | pyrite     | -1.17 | 0.14 | -2.25 | 0.18 | -4.96 | 0.95 | -0.01 | 0.13 | -0.67 | 0.89 |
| Mount2_4@09    | XI-3390NCM27-B1 | 1 | pyrite     | -1.30 | 0.13 | -2.44 | 0.18 | -4.98 | 1.02 | -0.04 | 0.13 | -0.32 | 0.96 |
| Mount2_4@10    | XI-3390NCM27-B1 | 1 | pyrite     | -1.39 | 0.14 | -2.32 | 0.18 | -5.46 | 1.00 | -0.19 | 0.13 | -1.03 | 0.94 |
| Mount2_5@01    | XI-3390NCM29-B3 | 1 | pyrite     | -0.29 | 0.15 | -0.34 | 0.19 | -0.29 | 0.96 | -0.12 | 0.15 | 0.35  | 0.90 |
| Mount2_5@02    | XI-3390NCM29-B3 | 1 | pyrite     | -0.31 | 0.14 | -0.50 | 0.18 | -1.46 | 0.96 | -0.05 | 0.13 | -0.51 | 0.90 |
| Mount2_5@03    | XI-3390NCM29-B3 | 1 | pyrite     | -0.11 | 0.15 | -0.23 | 0.18 | -0.66 | 0.96 | 0.01  | 0.14 | -0.23 | 0.90 |
| Mount2_5@04    | XI-3390NCM29-B3 | 1 | pyrite     | -0.16 | 0.14 | -0.24 | 0.18 | -0.15 | 1.00 | -0.04 | 0.14 | 0.30  | 0.94 |
| Mount2_5@05    | XI-3390NCM29-B3 | 1 | pyrite     | -0.20 | 0.14 | -0.23 | 0.19 | -0.71 | 0.96 | -0.08 | 0.14 | -0.27 | 0.91 |
| Mount2_5@06    | XI-3390NCM29-B3 | 1 | pyrite     | -0.16 | 0.15 | -0.12 | 0.19 | -0.51 | 0.97 | -0.10 | 0.14 | -0.28 | 0.91 |
| Mount2_5@07    | XI-3390NCM29-B3 | 1 | pyrite     | -0.11 | 0.14 | -0.01 | 0.18 | -0.87 | 0.99 | -0.11 | 0.13 | -0.85 | 0.93 |
| Mount2_5@08    | XI-3390NCM29-B3 | 1 | pyrite     | -0.07 | 0.14 | -0.24 | 0.18 | -1.94 | 0.97 | 0.06  | 0.14 | -1.47 | 0.91 |
| Mount2_5@09    | XI-3390NCM29-B3 | 1 | pyrite     | -0.16 | 0.14 | -0.25 | 0.18 | -1.50 | 1.02 | -0.03 | 0.13 | -1.03 | 0.97 |
| Mount2_5@10    | XI-3390NCM29-B3 | 1 | pyrite     | -0.06 | 0.14 | 0.00  | 0.19 | -0.35 | 0.97 | -0.06 | 0.13 | -0.34 | 0.92 |
| Mount2_6@01    | XI-3390NCM29-B4 | 1 | pyrite     | 0.28  | 0.14 | 0.73  | 0.19 | 1.24  | 0.98 | -0.10 | 0.13 | -0.17 | 0.92 |
| Mount2_6@02    | XI-3390NCM29-B4 | 1 | pyrite     | 0.15  | 0.14 | 0.66  | 0.19 | 0.88  | 0.99 | -0.19 | 0.13 | -0.38 | 0.94 |
| Mount2_6@03    | XI-3390NCM29-B4 | 1 | pyrite     | 0.28  | 0.15 | 0.57  | 0.19 | 1.17  | 0.98 | -0.02 | 0.14 | 0.08  | 0.93 |
| Mount2_6@04    | XI-3390NCM29-B4 | 1 | pyrite     | -0.09 | 0.16 | -0.07 | 0.19 | -0.63 | 0.98 | -0.05 | 0.16 | -0.50 | 0.93 |
| Mount2_6@05    | XI-3390NCM29-B4 | 1 | pyrite     | -0.22 | 0.15 | -0.20 | 0.19 | -0.94 | 0.99 | -0.12 | 0.14 | -0.56 | 0.93 |
| Mount2_6@06    | XI-3390NCM29-B4 | 1 | pyrite     | 0.29  | 0.14 | 0.64  | 0.19 | 1.16  | 1.00 | -0.04 | 0.13 | -0.06 | 0.95 |
| Mount2_6@07    | XI-3390NCM29-B4 | 1 | pyrite     | 0.34  | 0.14 | 0.64  | 0.19 | 0.68  | 1.03 | 0.01  | 0.13 | -0.54 | 0.98 |
| Mount2_6@08    | XI-3390NCM29-B4 | 1 | pyrite     | 0.14  | 0.14 | 0.43  | 0.19 | 1.00  | 1.00 | -0.08 | 0.13 | 0.18  | 0.94 |
| Mount2_6@09    | XI-3390NCM29-B4 | 1 | pyrite     | 0.22  | 0.14 | 0.45  | 0.19 | 0.60  | 1.00 | -0.01 | 0.14 | -0.25 | 0.95 |
| Mount2_6@10    | XI-3390NCM29-B4 | 1 | pyrite     | 0.02  | 0.16 | 0.20  | 0.19 | 0.42  | 1.00 | -0.09 | 0.15 | 0.03  | 0.95 |
| Mount3_1@01    | XI-3390NCM29-B4 | 1 | pyrite     | 0.73  | 0.17 | 1.43  | 0.24 | 2.28  | 0.99 | -0.01 | 0.16 | -0.46 | 0.89 |
| Mount3_1@02    | XI-3390NCM29-B4 | 1 | pyrite     | 0.74  | 0.16 | 1.54  | 0.24 | 3.30  | 0.99 | -0.05 | 0.16 | 0.36  | 0.89 |
| Mount3_1@03    | XI-3390NCM29-B4 | 1 | pyrite     | 0.44  | 0.16 | 1.05  | 0.23 | 1.50  | 0.99 | -0.10 | 0.16 | -0.51 | 0.89 |
| Mount3_1@04    | XI-3390NCM29-B4 | 1 | pyrite     | -0.45 | 0.16 | -0.78 | 0.23 | -1.43 | 0.98 | -0.05 | 0.15 | 0.06  | 0.88 |
| Mount3_1@05    | XI-3390NCM29-B4 | 1 | pyrite     | 0.70  | 0.16 | 1.46  | 0.23 | 2.38  | 0.99 | -0.06 | 0.16 | -0.42 | 0.90 |
| Mount3_1@06    | XI-3390NCM29-B4 | 1 | pyrite     | 0.91  | 0.16 | 1.84  | 0.23 | 3.07  | 0.98 | -0.04 | 0.16 | -0.45 | 0.88 |
| Mount3_1@07    | XI-3390NCM29-B4 | 1 | pyrite     | 0.38  | 0.16 | 0.79  | 0.23 | 0.76  | 0.98 | -0.03 | 0.15 | -0.74 | 0.88 |
| Mount3_1@08    | XI-3390NCM29-B4 | 1 | pyrite     | 0.31  | 0.16 | 0.59  | 0.23 | 0.44  | 0.98 | 0.01  | 0.16 | -0.68 | 0.88 |
| Mount3_1@09    | XI-3390NCM29-B4 | 1 | pyrite     | 0.46  | 0.17 | 0.84  | 0.23 | 1.55  | 1.05 | 0.03  | 0.17 | -0.05 | 0.96 |
| Mount3_1@10    | XI-3390NCM29-B4 | 1 | pyrite     | 0.40  | 0.16 | 1.00  | 0.23 | 2.00  | 0.98 | -0.12 | 0.15 | 0.08  | 0.88 |

|                |                 |   |            |      |      |       |      |       |      |       |      |       |      |
|----------------|-----------------|---|------------|------|------|-------|------|-------|------|-------|------|-------|------|
| Mount3_1@11    | XI-3390NCM29-B4 | 1 | pyrite     | 0.56 | 0.16 | 0.90  | 0.23 | 1.08  | 0.97 | 0.10  | 0.16 | −0.64 | 0.87 |
| Mount3_1@12    | XI-3390NCM29-B4 | 1 | pyrite     | 0.93 | 0.17 | 1.75  | 0.23 | 3.80  | 0.98 | 0.02  | 0.16 | 0.46  | 0.88 |
| Mount3_1@13    | XI-3390NCM29-B4 | 1 | pyrite     | 0.71 | 0.16 | 1.38  | 0.23 | 1.87  | 1.09 | 0.00  | 0.16 | −0.78 | 1.00 |
| Mount3_1@14    | XI-3390NCM29-B4 | 1 | pyrite     | 0.97 | 0.17 | 1.95  | 0.23 | 3.20  | 0.97 | −0.03 | 0.16 | −0.52 | 0.87 |
| Mount3_1@15    | XI-3390NCM29-B4 | 1 | pyrite     | 1.19 | 0.16 | 2.26  | 0.23 | 4.19  | 0.97 | 0.02  | 0.16 | −0.14 | 0.87 |
| Mount3_1@16    | XI-3390NCM29-B4 | 1 | pyrite     | 0.65 | 0.16 | 1.20  | 0.23 | 1.97  | 1.00 | 0.03  | 0.15 | −0.32 | 0.90 |
| Mount3_1@17    | XI-3390NCM29-B4 | 1 | pyrite     | 0.70 | 0.16 | 1.47  | 0.23 | 1.74  | 0.97 | −0.06 | 0.16 | −1.06 | 0.87 |
| Mount3_1@18    | XI-3390NCM29-B4 | 1 | pyrite     | 1.05 | 0.17 | 2.07  | 0.23 | 3.60  | 0.97 | −0.02 | 0.17 | −0.35 | 0.87 |
| Mount3_1@19    | XI-3390NCM29-B4 | 1 | pyrite     | 0.66 | 0.16 | 1.25  | 0.23 | 1.73  | 0.97 | 0.02  | 0.16 | −0.65 | 0.87 |
| Mount3_1@20    | XI-3390NCM29-B4 | 1 | pyrite     | 0.29 | 0.16 | 0.54  | 0.23 | 0.18  | 0.97 | 0.01  | 0.16 | −0.86 | 0.86 |
| Mount3_3@01    | XI-3390NCM29-B5 | 3 | pyrite     | 2.37 | 0.15 | 4.58  | 0.23 | 7.83  | 1.00 | 0.02  | 0.15 | −0.93 | 0.90 |
| Mount3_3@02    | XI-3390NCM29-B5 | 3 | pyrite     | 2.44 | 0.16 | 4.46  | 0.23 | 8.87  | 0.97 | 0.15  | 0.16 | 0.33  | 0.87 |
| Mount3_3@03    | XI-3390NCM29-B5 | 3 | pyrite     | 2.29 | 0.16 | 4.58  | 0.23 | 8.26  | 0.97 | −0.07 | 0.15 | −0.52 | 0.87 |
| Mount3_3@04    | XI-3390NCM29-B5 | 3 | pyrite     | 2.18 | 0.16 | 4.27  | 0.23 | 7.51  | 0.98 | −0.02 | 0.15 | −0.66 | 0.87 |
| Mount3_3@05    | XI-3390NCM29-B5 | 3 | pyrite     | 2.11 | 0.17 | 4.20  | 0.23 | 7.76  | 0.97 | −0.05 | 0.16 | −0.27 | 0.87 |
| Mount3_3@06    | XI-3390NCM29-B5 | 3 | pyrite     | 2.08 | 0.15 | 3.90  | 0.24 | 6.26  | 1.04 | 0.07  | 0.15 | −1.21 | 0.95 |
| Mount3_3@07    | XI-3390NCM29-B5 | 3 | pyrite     | 2.27 | 0.15 | 4.34  | 0.23 | 7.49  | 0.97 | 0.04  | 0.15 | −0.81 | 0.86 |
| Mount3_3@09    | XI-3390NCM29-B5 | 3 | pyrite     | 2.99 | 0.16 | 5.83  | 0.23 | 10.49 | 0.97 | −0.01 | 0.16 | −0.67 | 0.87 |
| Mount3_3@10    | XI-3390NCM29-B5 | 3 | pyrite     | 3.05 | 0.15 | 5.85  | 0.23 | 10.87 | 0.97 | 0.04  | 0.15 | −0.32 | 0.87 |
| Mount3_3@11    | XI-3390NCM29-B5 | 3 | pyrite     | 2.93 | 0.16 | 5.82  | 0.23 | 10.69 | 0.97 | −0.06 | 0.16 | −0.45 | 0.87 |
| Mount3_3@12    | XI-3390NCM29-B5 | 3 | pyrite     | 3.13 | 0.15 | 6.03  | 0.23 | 11.07 | 0.97 | 0.03  | 0.15 | −0.47 | 0.87 |
| Mount3_3@13    | XI-3390NCM29-B5 | 3 | pyrite     | 3.11 | 0.16 | 5.90  | 0.23 | 11.45 | 1.04 | 0.08  | 0.16 | 0.15  | 0.94 |
| Mount3_3@14    | XI-3390NCM29-B5 | 3 | pyrite     | 2.14 | 0.15 | 4.06  | 0.23 | 7.25  | 0.96 | 0.05  | 0.15 | −0.52 | 0.86 |
| Mount3_3@15    | XI-3390NCM29-B5 | 3 | pyrite     | 2.13 | 0.18 | 4.24  | 0.23 | 6.84  | 0.96 | −0.05 | 0.18 | −1.26 | 0.86 |
| Mount3_3@16    | XI-3390NCM29-B5 | 3 | pyrite     | 2.13 | 0.16 | 4.22  | 0.23 | 7.72  | 0.96 | −0.04 | 0.15 | −0.34 | 0.86 |
| Mount3_3@17    | XI-3390NCM29-B5 | 3 | pyrite     | 2.18 | 0.16 | 4.31  | 0.23 | 7.87  | 0.96 | −0.03 | 0.16 | −0.38 | 0.86 |
| Mount3_3@18    | XI-3390NCM29-B5 | 3 | pyrite     | 1.87 | 0.16 | 3.84  | 0.23 | 6.07  | 1.03 | −0.10 | 0.15 | −1.27 | 0.93 |
| Mount3_3@19    | XI-3390NCM29-B5 | 3 | pyrite     | 2.18 | 0.15 | 4.43  | 0.23 | 8.09  | 0.96 | −0.10 | 0.15 | −0.40 | 0.86 |
| Mount3_3@20    | XI-3390NCM29-B5 | 3 | pyrite     | 2.22 | 0.15 | 4.33  | 0.23 | 7.16  | 0.96 | −0.01 | 0.15 | −1.12 | 0.86 |
| Mount3_4@01    | XI-3390NCM29-B5 | 3 | pyrite     | 2.23 | 0.15 | 4.36  | 0.23 | 8.75  | 1.05 | −0.01 | 0.15 | 0.40  | 0.96 |
| Mount3_4@02    | XI-3390NCM29-B5 | 3 | pyrite     | 2.20 | 0.15 | 4.46  | 0.23 | 8.50  | 0.99 | −0.09 | 0.15 | −0.04 | 0.89 |
| Mount3_4@03    | XI-3390NCM29-B5 | 3 | pyrite     | 2.18 | 0.16 | 4.33  | 0.23 | 8.23  | 0.97 | −0.05 | 0.15 | −0.06 | 0.86 |
| Mount3_4@04    | XI-3390NCM29-B5 | 3 | pyrite     | 2.05 | 0.16 | 4.27  | 0.23 | 7.32  | 0.97 | −0.15 | 0.15 | −0.85 | 0.86 |
| Mount3_4@05    | XI-3390NCM29-B5 | 3 | pyrite     | 1.80 | 0.15 | 3.50  | 0.23 | 6.65  | 0.97 | 0.00  | 0.15 | −0.04 | 0.86 |
| Mount3_4@06    | XI-3390NCM29-B5 | 3 | pyrite     | 1.60 | 0.15 | 3.26  | 0.23 | 6.14  | 1.00 | −0.08 | 0.15 | −0.11 | 0.89 |
| Mount3_4@07    | XI-3390NCM29-B5 | 3 | pyrite     | 2.85 | 0.15 | 5.66  | 0.23 | 10.67 | 0.97 | −0.06 | 0.15 | −0.16 | 0.87 |
| Mount3_4@08    | XI-3390NCM29-B5 | 3 | pyrite     | 2.17 | 0.16 | 4.21  | 0.23 | 7.96  | 0.99 | 0.01  | 0.16 | −0.09 | 0.89 |
| Mount3_4@09    | XI-3390NCM29-B5 | 3 | pyrite     | 2.17 | 0.16 | 4.35  | 0.23 | 7.09  | 0.97 | −0.07 | 0.15 | −1.24 | 0.86 |
| Mount3_4@10    | XI-3390NCM29-B5 | 3 | pyrite     | 2.12 | 0.16 | 4.26  | 0.23 | 6.79  | 1.00 | −0.07 | 0.15 | −1.37 | 0.90 |
| Mount3_4@11    | XI-3390NCM29-B5 | 3 | pyrite     | 2.04 | 0.15 | 4.19  | 0.23 | 7.64  | 0.99 | −0.11 | 0.15 | −0.37 | 0.89 |
| Mount3_4@12    | XI-3390NCM29-B5 | 3 | pyrite     | 1.91 | 0.16 | 3.78  | 0.23 | 6.81  | 0.97 | −0.03 | 0.16 | −0.41 | 0.87 |
| Mount3_4@13    | XI-3390NCM29-B5 | 3 | pyrite     | 2.13 | 0.16 | 4.04  | 0.23 | 6.54  | 1.02 | 0.05  | 0.16 | −1.19 | 0.92 |
| Mount3_4@14    | XI-3390NCM29-B5 | 3 | pyrite     | 1.43 | 0.15 | 2.88  | 0.24 | 4.83  | 1.04 | −0.05 | 0.15 | −0.68 | 0.95 |
| Mount3_4@15    | XI-3390NCM29-B5 | 3 | pyrite     | 1.19 | 0.16 | 2.32  | 0.23 | 3.53  | 0.97 | −0.01 | 0.15 | −0.90 | 0.87 |
| Mount3_4@16    | XI-3390NCM29-B5 | 3 | pyrite     | 1.56 | 0.15 | 3.09  | 0.23 | 5.25  | 0.97 | −0.03 | 0.15 | −0.67 | 0.87 |
| Mount3_4@17    | XI-3390NCM29-B5 | 3 | pyrite     | 2.26 | 0.15 | 4.56  | 0.23 | 8.68  | 0.97 | −0.09 | 0.15 | −0.05 | 0.87 |
| Mount3_4@18    | XI-3390NCM29-B5 | 3 | pyrite     | 2.15 | 0.15 | 4.35  | 0.23 | 8.66  | 0.99 | −0.09 | 0.15 | 0.34  | 0.89 |
| Mount3_4@19    | XI-3390NCM29-B5 | 3 | pyrite     | 2.38 | 0.15 | 4.66  | 0.23 | 8.39  | 0.97 | −0.02 | 0.15 | −0.52 | 0.87 |
| Mount3_4@20    | XI-3390NCM29-B5 | 3 | pyrite     | 1.83 | 0.17 | 3.58  | 0.24 | 6.28  | 0.97 | −0.01 | 0.16 | −0.56 | 0.88 |
| Mount3_6@01    | XI-3390NCM29-B6 | 2 | pyrite     | 5.05 | 0.16 | 9.81  | 0.23 | 18.04 | 0.98 | 0.01  | 0.16 | −0.78 | 0.88 |
| Mount3_6@02    | XI-3390NCM29-B6 | 2 | pyrite     | 4.89 | 0.16 | 9.53  | 0.23 | 18.07 | 0.99 | 0.00  | 0.15 | −0.20 | 0.90 |
| Mount3_6@03    | XI-3390NCM29-B6 | 2 | pyrite     | 4.86 | 0.16 | 9.45  | 0.23 | 17.39 | 0.99 | 0.00  | 0.16 | −0.74 | 0.89 |
| Mount3_6@04    | XI-3390NCM29-B6 | 2 | pyrite     | 4.92 | 0.16 | 9.69  | 0.23 | 17.28 | 0.99 | −0.06 | 0.15 | −1.31 | 0.89 |
| Mount3_6@05    | XI-3390NCM29-B6 | 2 | pyrite     | 5.01 | 0.16 | 9.91  | 0.23 | 17.57 | 0.98 | −0.08 | 0.16 | −1.45 | 0.88 |
| Mount3_6@06    | XI-3390NCM29-B6 | 2 | pyrite     | 4.84 | 0.16 | 9.63  | 0.23 | 17.23 | 0.99 | −0.11 | 0.16 | −1.25 | 0.89 |
| Mount3_6@07    | XI-3390NCM29-B6 | 2 | pyrite     | 4.87 | 0.17 | 9.57  | 0.23 | 17.54 | 1.01 | −0.05 | 0.17 | −0.82 | 0.91 |
| Mount3_6@08    | XI-3390NCM29-B6 | 2 | pyrite     | 4.73 | 0.16 | 9.47  | 0.23 | 17.58 | 0.99 | −0.14 | 0.15 | −0.59 | 0.89 |
| Mount3_6@09    | XI-3390NCM29-B6 | 2 | pyrite     | 4.93 | 0.16 | 9.61  | 0.23 | 17.04 | 0.99 | 0.00  | 0.15 | −1.40 | 0.89 |
| Mount3_6@10    | XI-3390NCM29-B6 | 2 | pyrite     | 4.84 | 0.16 | 9.42  | 0.23 | 17.19 | 1.07 | −0.01 | 0.15 | −0.89 | 0.98 |
| Mount3_6_po@01 | XI-3390NCM29-B6 | 2 | pyrrhotite | 5.50 | 0.22 | 10.78 | 0.23 | 19.93 | 1.06 | −0.04 | 0.19 | −0.76 | 1.00 |
| Mount3_6_po@02 | XI-3390NCM29-B6 | 2 | pyrrhotite | 5.40 | 0.22 | 10.47 | 0.24 | 19.52 | 1.08 | 0.02  | 0.19 | −0.58 | 1.03 |
| Mount3_6_po@03 | XI-3390NCM29-B6 | 2 | pyrrhotite | 5.56 | 0.22 | 10.83 | 0.23 | 20.93 | 1.07 | 0.00  | 0.19 | 0.14  | 1.02 |
| Mount3_6_po@04 | XI-3390NCM29-B6 | 2 | pyrrhotite | 5.68 | 0.23 | 10.93 | 0.23 | 20.77 | 1.03 | 0.07  | 0.20 | −0.21 | 0.97 |
| Mount3_6_po@05 | XI-3390NCM29-B6 | 2 | pyrrhotite | 5.68 | 0.21 | 11.04 | 0.23 | 21.12 | 1.03 | 0.01  | 0.18 | −0.08 | 0.97 |

|                |                 |   |            |      |      |       |      |       |      |       |      |       |      |
|----------------|-----------------|---|------------|------|------|-------|------|-------|------|-------|------|-------|------|
| Mount3_6_po@06 | XI-3390NCM29-B6 | 2 | pyrrhotite | 5.61 | 0.21 | 10.75 | 0.23 | 19.27 | 1.03 | 0.09  | 0.18 | -1.36 | 0.97 |
| Mount3_6_po@07 | XI-3390NCM29-B6 | 2 | pyrrhotite | 5.61 | 0.22 | 10.82 | 0.23 | 20.53 | 1.03 | 0.06  | 0.18 | -0.24 | 0.97 |
| Mount3_6_po@08 | XI-3390NCM29-B6 | 2 | pyrrhotite | 5.65 | 0.21 | 10.86 | 0.23 | 20.46 | 1.04 | 0.07  | 0.18 | -0.38 | 0.98 |
| Mount3_6_po@09 | XI-3390NCM29-B6 | 2 | pyrrhotite | 5.60 | 0.23 | 10.80 | 0.23 | 19.99 | 1.04 | 0.05  | 0.20 | -0.73 | 0.98 |
| Mount3_6_po@10 | XI-3390NCM29-B6 | 2 | pyrrhotite | 5.30 | 0.22 | 10.42 | 0.24 | 20.01 | 1.04 | -0.05 | 0.18 | 0.01  | 0.98 |
| Mount4_3@01    | XI-3390NCM29-B7 | 3 | pyrite     | 2.76 | 0.20 | 5.51  | 0.25 | 10.87 | 0.95 | -0.08 | 0.17 | 0.33  | 1.00 |
| Mount4_3@02    | XI-3390NCM29-B7 | 3 | pyrite     | 1.56 | 0.19 | 3.19  | 0.25 | 6.25  | 0.81 | -0.09 | 0.17 | 0.15  | 0.87 |
| Mount4_3@03    | XI-3390NCM29-B7 | 3 | pyrite     | 1.94 | 0.21 | 3.88  | 0.25 | 7.37  | 0.82 | -0.05 | 0.19 | -0.05 | 0.88 |
| Mount4_3@04    | XI-3390NCM29-B7 | 3 | pyrite     | 2.20 | 0.20 | 4.39  | 0.25 | 7.72  | 0.82 | -0.06 | 0.17 | -0.69 | 0.88 |
| Mount4_3@05    | XI-3390NCM29-B7 | 3 | pyrite     | 2.20 | 0.21 | 4.35  | 0.25 | 7.81  | 0.82 | -0.03 | 0.19 | -0.51 | 0.88 |
| Mount4_3@06    | XI-3390NCM29-B7 | 3 | pyrite     | 1.86 | 0.19 | 3.71  | 0.24 | 6.64  | 0.87 | -0.05 | 0.17 | -0.46 | 0.92 |
| Mount4_3@07    | XI-3390NCM29-B7 | 3 | pyrite     | 1.93 | 0.19 | 3.90  | 0.25 | 7.28  | 0.83 | -0.07 | 0.16 | -0.18 | 0.89 |
| Mount4_3@08    | XI-3390NCM29-B7 | 3 | pyrite     | 2.00 | 0.20 | 3.76  | 0.26 | 6.79  | 0.83 | 0.06  | 0.18 | -0.41 | 0.90 |
| Mount4_3@09    | XI-3390NCM29-B7 | 3 | pyrite     | 2.10 | 0.20 | 4.26  | 0.28 | 7.19  | 0.90 | -0.10 | 0.18 | -0.97 | 0.98 |
| Mount4_3@10    | XI-3390NCM29-B7 | 3 | pyrite     | 2.18 | 0.20 | 4.32  | 0.25 | 7.35  | 0.83 | -0.04 | 0.18 | -0.93 | 0.90 |
| Mount4_4@01    | XI-3390NCM29-B7 | 3 | pyrite     | 3.81 | 0.19 | 7.29  | 0.24 | 13.99 | 0.81 | 0.06  | 0.16 | 0.03  | 0.86 |
| Mount4_4@02    | XI-3390NCM29-B7 | 3 | pyrite     | 2.13 | 0.19 | 4.08  | 0.28 | 7.13  | 0.84 | 0.03  | 0.17 | -0.68 | 0.93 |
| Mount4_4@03    | XI-3390NCM29-B7 | 3 | pyrite     | 2.05 | 0.20 | 4.14  | 0.25 | 8.21  | 0.80 | -0.08 | 0.17 | 0.28  | 0.87 |
| Mount4_4@04    | XI-3390NCM29-B7 | 3 | pyrite     | 2.44 | 0.20 | 4.75  | 0.24 | 9.03  | 0.80 | 0.00  | 0.17 | -0.05 | 0.85 |
| Mount4_4@05    | XI-3390NCM29-B7 | 3 | pyrite     | 2.16 | 0.19 | 4.54  | 0.26 | 8.27  | 0.81 | -0.17 | 0.17 | -0.42 | 0.88 |
| Mount4_4@06    | XI-3390NCM29-B7 | 3 | pyrite     | 2.78 | 0.22 | 5.44  | 0.24 | 9.96  | 0.80 | -0.02 | 0.19 | -0.45 | 0.86 |
| Mount4_4@07    | XI-3390NCM29-B7 | 3 | pyrite     | 2.74 | 0.20 | 5.42  | 0.25 | 10.55 | 0.80 | -0.05 | 0.18 | 0.17  | 0.86 |
| Mount4_4@08    | XI-3390NCM29-B7 | 3 | pyrite     | 3.01 | 0.21 | 6.11  | 0.25 | 11.41 | 0.81 | -0.13 | 0.18 | -0.29 | 0.87 |
| Mount4_4@09    | XI-3390NCM29-B7 | 3 | pyrite     | 2.29 | 0.19 | 4.60  | 0.25 | 9.09  | 0.80 | -0.08 | 0.16 | 0.28  | 0.86 |
| Mount4_4@10    | XI-3390NCM29-B7 | 3 | pyrite     | 2.31 | 0.19 | 4.59  | 0.25 | 8.52  | 0.80 | -0.06 | 0.16 | -0.27 | 0.86 |
| Mount4_4@11    | XI-3390NCM29-B7 | 3 | pyrite     | 2.35 | 0.20 | 4.67  | 0.25 | 9.07  | 0.81 | -0.06 | 0.17 | 0.13  | 0.86 |
| Mount4_5@01    | XI-3390NCM29-B7 | 3 | pyrite     | 2.66 | 0.20 | 5.35  | 0.26 | 10.44 | 0.83 | -0.09 | 0.18 | 0.20  | 0.90 |
| Mount4_5@02    | XI-3390NCM29-B7 | 3 | pyrite     | 2.75 | 0.20 | 5.55  | 0.25 | 11.06 | 0.83 | -0.10 | 0.17 | 0.43  | 0.89 |
| Mount4_5@03    | XI-3390NCM29-B7 | 3 | pyrite     | 2.73 | 0.20 | 5.48  | 0.25 | 10.51 | 0.82 | -0.09 | 0.18 | 0.02  | 0.89 |
| Mount4_5@04    | XI-3390NCM29-B7 | 3 | pyrite     | 2.87 | 0.19 | 5.58  | 0.25 | 11.44 | 0.82 | 0.00  | 0.17 | 0.76  | 0.89 |
| Mount4_5@05    | XI-3390NCM29-B7 | 3 | pyrite     | 3.08 | 0.19 | 6.04  | 0.25 | 11.10 | 0.94 | -0.02 | 0.17 | -0.47 | 1.00 |
| Mount4_5@06    | XI-3390NCM29-B7 | 3 | pyrite     | 3.13 | 0.20 | 6.06  | 0.26 | 11.30 | 0.81 | 0.02  | 0.17 | -0.30 | 0.88 |
| Mount4_5@07    | XI-3390NCM29-B7 | 3 | pyrite     | 1.74 | 0.19 | 3.29  | 0.24 | 6.48  | 0.95 | 0.05  | 0.16 | 0.19  | 1.00 |
| Mount4_5@08    | XI-3390NCM29-B7 | 3 | pyrite     | 1.23 | 0.23 | 2.51  | 0.34 | 4.83  | 0.96 | -0.06 | 0.24 | 0.03  | 1.10 |
| Mount4_5@09    | XI-3390NCM29-B7 | 3 | pyrite     | 1.41 | 0.19 | 2.92  | 0.25 | 5.52  | 0.81 | -0.10 | 0.16 | -0.07 | 0.87 |
| Mount4_5@10    | XI-3390NCM29-B7 | 3 | pyrite     | 2.72 | 0.19 | 5.36  | 0.26 | 9.93  | 0.83 | -0.04 | 0.17 | -0.34 | 0.90 |
| Mount4_5@11    | XI-3390NCM29-B7 | 3 | pyrite     | 2.82 | 0.19 | 5.57  | 0.26 | 10.14 | 0.95 | -0.04 | 0.17 | -0.53 | 1.01 |

Table S5. Pb isotope compositions of sulfides from the Shenshuitan and Hongqigou gold deposits.

| No. | sample             | rock type                  | ore sub-type | mineral      | $^{206}\text{Pb}/^{204}\text{Pb}$ | $^{207}\text{Pb}/^{204}\text{Pb}$ | $^{208}\text{Pb}/^{204}\text{Pb}$ | ore district/<br>comments | references |
|-----|--------------------|----------------------------|--------------|--------------|-----------------------------------|-----------------------------------|-----------------------------------|---------------------------|------------|
| 1   | XI-3390NCM11-B1Apy | phyllic brecciated granite | 1            | arsenopyrite | 18.436                            | 15.638                            | 38.462                            | Shenshuitan               | this study |
| 2   | XI-3390NCM11-B1Po  | phyllic brecciated granite | 1            | pyrrhotite   | 18.402                            | 15.605                            | 38.374                            | Shenshuitan               | this study |
| 3   | XI-3390NCM11-B1Py  | phyllic brecciated granite | 1            | pyrite       | 18.358                            | 15.582                            | 38.399                            | Shenshuitan               | this study |
| 4   | XI-3390NCM11-B2Apy | phyllic brecciated granite | 1            | arsenopyrite | 18.254                            | 15.600                            | 38.201                            | Shenshuitan               | this study |
| 5   | XI-3390NCM11-B2Po  | phyllic brecciated granite | 1            | pyrrhotite   | 18.400                            | 15.616                            | 38.416                            | Shenshuitan               | this study |
| 6   | XI-3390NCM11-B2Py  | phyllic brecciated granite | 1            | pyrite       | 19.341                            | 15.606                            | 38.307                            | Shenshuitan               | this study |
| 7   | XI-3390NCM11-B3Apy | phyllic brecciated granite | 1            | arsenopyrite | 18.071                            | 15.530                            | 37.908                            | Shenshuitan               | this study |
| 8   | XI-3390NCM11-B3Py  | phyllic brecciated granite | 1            | pyrite       | 18.463                            | 15.600                            | 38.669                            | Shenshuitan               | this study |
| 9   | XI-3390NCM17-B1Py  | phyllic brecciated granite | 1            | pyrite       | 18.584                            | 15.624                            | 38.521                            | Shenshuitan               | this study |
| 10  | XI-3390NCM17-B2Apy | phyllic brecciated granite | 1            | arsenopyrite | 18.561                            | 15.658                            | 38.628                            | Shenshuitan               | this study |



|    |                    |                                                   |   |              |        |        |        |             |            |
|----|--------------------|---------------------------------------------------|---|--------------|--------|--------|--------|-------------|------------|
| 11 | XI-3390NCM17-B2Po  | phyllic brecciated granite                        | 1 | pyrrhotite   | 18.555 | 15.651 | 38.702 | Shenshuitan | this study |
| 12 | XI-3390NCM17-B2Py  | phyllic brecciated granite                        | 1 | pyrite       | 18.470 | 15.656 | 38.605 | Shenshuitan | this study |
| 13 | XI-3390NCM27-B1Py  | phyllic brecciated granite                        | 1 | pyrite       | 18.530 | 15.650 | 38.581 | Shenshuitan | this study |
| 14 | XI-3390NCM27-B2Apy | phyllic brecciated granite                        | 1 | arsenopyrite | 18.441 | 15.639 | 38.505 | Shenshuitan | this study |
| 15 | XI-3390NCM27-B3Apy | pyritized slate                                   | 2 | arsenopyrite | 18.459 | 15.629 | 38.459 | Shenshuitan | this study |
| 16 | XI-3390NCM27-B3Po  | pyritized slate                                   | 2 | pyrrhotite   | 18.409 | 15.595 | 38.295 | Shenshuitan | this study |
| 17 | XI-3390NCM29-B1Po  | phyllic brecciated granite                        | 1 | pyrrhotite   | 18.400 | 15.605 | 38.341 | Shenshuitan | this study |
| 18 | XI-3390NCM29-B1Py  | phyllic brecciated granite                        | 1 | pyrite       | 18.398 | 15.620 | 38.401 | Shenshuitan | this study |
| 19 | XI-3390NCM29-B2Apy | phyllic brecciated granite                        | 1 | arsenopyrite | 18.427 | 15.628 | 38.467 | Shenshuitan | this study |
| 20 | XI-3390NCM29-B2Py  | phyllic brecciated granite                        | 1 | pyrite       | 18.440 | 15.644 | 38.517 | Shenshuitan | this study |
| 21 | XI-3390NCM29-B3Apy | phyllic brecciated granite                        | 1 | arsenopyrite | 18.418 | 15.626 | 38.458 | Shenshuitan | this study |
| 22 | XI-3390NCM29-B3Py  | phyllic brecciated granite                        | 1 | pyrite       | 18.444 | 15.655 | 38.554 | Shenshuitan | this study |
| 23 | XI-3390NCM29-B4Apy | phyllic brecciated granite                        | 1 | arsenopyrite | 18.439 | 15.613 | 38.401 | Shenshuitan | this study |
| 24 | XI-3390NCM29-B4Po  | phyllic brecciated granite                        | 1 | pyrrhotite   | 18.570 | 15.604 | 38.347 | Shenshuitan | this study |
| 25 | XI-3390NCM29-B4Py  | phyllic brecciated granite                        | 1 | pyrite       | 18.438 | 15.632 | 38.472 | Shenshuitan | this study |
| 26 | XI-3390NCM29-B5Gn  | quartz calcite vein in phyllic brecciated granite | 3 | galena       | 18.435 | 15.646 | 38.511 | Shenshuitan | this study |
| 27 | XI-3390NCM29-B5Py  | quartz calcite vein in phyllic brecciated granite | 3 | pyrite       | 18.431 | 15.641 | 38.498 | Shenshuitan | this study |
| 28 | XI-3390NCM29-B5Sp  | quartz calcite vein in phyllic brecciated granite | 3 | sphalerite   | 18.425 | 15.631 | 38.461 | Shenshuitan | this study |
| 29 | XI-3390NCM29-B6Po  | pyritized slate                                   | 2 | pyrrhotite   | 18.483 | 15.669 | 38.667 | Shenshuitan | this study |
| 30 | XI-3390NCM29-B6Py  | pyritized slate                                   | 2 | pyrite       | 18.521 | 15.610 | 38.558 | Shenshuitan | this study |
| 31 | XI-3390NCM29-B7Gn  | quartz calcite vein in phyllic brecciated granite | 3 | galena       | 18.418 | 15.627 | 38.449 | Shenshuitan | this study |
| 32 | XI-3390NCM29-B7Py  | quartz calcite vein in phyllic brecciated granite | 3 | pyrite       | 18.454 | 15.666 | 38.576 | Shenshuitan | this study |
| 33 | XI-3390NCM29-B7Sp  | quartz calcite vein in phyllic brecciated granite | 3 | sphalerite   | 18.425 | 15.632 | 38.467 | Shenshuitan | this study |
| 34 | XI-3390NCM7-B1Apy  | phyllic brecciated granite                        | 1 | arsenopyrite | 18.327 | 15.605 | 38.329 | Shenshuitan | this study |
| 35 | XI-3390NCM7-B1Po   | phyllic brecciated granite                        | 1 | pyrrhotite   | 18.369 | 15.610 | 38.381 | Shenshuitan | this study |
| 36 | XI-3390NCM7-B1Py   | phyllic brecciated granite                        | 1 | pyrite       | 18.364 | 15.623 | 38.407 | Shenshuitan | this study |
| 37 | XI-3390NCM7-B2Py   | phyllic brecciated granite                        | 1 | pyrite       | 18.346 | 15.628 | 38.403 | Shenshuitan | this study |
| 38 | XI-3390NCM7-B3Gn   | pyritized slate                                   | 2 | galena       | 18.373 | 15.673 | 38.541 | Shenshuitan | this study |
| 39 | XI-3390NCM7-B3Po   | pyritized slate                                   | 2 | pyrrhotite   | 18.388 | 15.649 | 38.474 | Shenshuitan | this study |
| 40 | XI-3390NCM7-B3Py   | pyritized slate                                   | 2 | pyrite       | 18.366 | 15.655 | 38.483 | Shenshuitan | this study |

|    |                  |                           |   |            |        |        |        |                 |            |
|----|------------------|---------------------------|---|------------|--------|--------|--------|-----------------|------------|
| 41 | XI-3390NCM7-B3Sp | pyritized slate           | 2 | sphalerite | 18.345 | 15.631 | 38.410 | Shenshuitan     | this study |
| 42 | HLG-PD3450-3-S6  | phyllitic rock            |   | pyrite     | 18.352 | 15.648 | 38.470 | Shenshuitan     | Liu 2017   |
| 43 | HLG-PD3450-25-S1 | phyllitic rock            |   | pyrite     | 18.396 | 15.640 | 38.572 | Shenshuitan     | Liu 2017   |
| 44 | HLG-PD3450-19-S3 | phyllitic rock            |   | pyrite     | 18.346 | 15.636 | 38.398 | Shenshuitan     | Liu 2017   |
| 45 | XI-SDNCM3-B2-1   | phyllitic rock            |   | pyrite     | 18.449 | 15.639 | 38.523 | Shenshuitan     | Liu 2017   |
| 46 | XI-SDNCM3-B5     | phyllitic rock            |   | pyrite     | 18.449 | 15.642 | 38.502 | Shenshuitan     | Liu 2017   |
| 47 | XI-SDNCM3-B8     | phyllitic rock            |   | pyrite     | 18.395 | 15.632 | 38.435 | Shenshuitan     | Liu 2017   |
| 48 | SST-1            | phyllitic rock            |   | pyrite     | 18.460 | 15.650 | 38.580 | shenshuitan     | Zhang 2018 |
| 49 | SST-2            | phyllitic rock            |   | Galena     | 18.500 | 15.660 | 38.610 | shenshuitan     | Zhang 2018 |
| 50 | SST-3            | phyllitic rock            |   | pyrite     | 18.250 | 15.600 | 38.180 | shenshuitan     | Zhang 2018 |
| 51 | SST-4            | phyllitic rock            |   | pyrite     | 18.380 | 15.640 | 38.470 | shenshuitan     | Zhang 2018 |
| 52 | SST-5            | phyllitic rock            |   | Galena     | 18.620 | 15.950 | 39.580 | shenshuitan     | Zhang 2018 |
| 53 | SST-6            | phyllitic rock            |   | pyrite     | 18.360 | 15.610 | 38.300 | shenshuitan     | Zhang 2018 |
| 54 | SST-7            | phyllitic rock            |   | Galena     | 18.380 | 15.590 | 38.540 | shenshuitan     | Zhang 2018 |
| 55 | 337000PD01-B2-Py | quartz vein               |   | pyrite     | 18.453 | 15.635 | 38.450 | Hongqigou       | Cheng 2020 |
| 56 | 337000PD01-B3-Py | quartz vein               |   | pyrite     | 18.424 | 15.678 | 38.538 | Hongqigou       | Cheng 2020 |
| 57 | 3810PD301-B1-Py  | quartz vein               |   | pyrite     | 18.275 | 15.656 | 38.555 | Hongqigou       | Cheng 2020 |
| 58 | 3810PD301-B1-Py  | quartz vein               |   | pyrite     | 18.265 | 15.655 | 38.535 | Hongqigou       | Cheng 2020 |
| 59 | 3810PD301-B3-Py  | quartz vein               |   | pyrite     | 18.479 | 15.639 | 38.448 | Hongqigou       | Cheng 2020 |
| 60 | 3810PD301-B4-Py  | quartz vein               |   | pyrite     | 18.422 | 15.632 | 38.388 | Hongqigou       | Cheng 2020 |
| 61 | 3810PD301-B5-Py  | quartz vein               |   | pyrite     | 18.421 | 15.639 | 38.450 | Hongqigou       | Cheng 2020 |
| 62 | 3810PD301-B6-Py  | quartz vein               |   | pyrite     | 18.297 | 15.624 | 38.469 | Hongqigou       | Cheng 2020 |
| 63 | 3810PD301-B7-Py  | quartz vein               |   | pyrite     | 18.444 | 15.636 | 38.442 | Hongqigou       | Cheng 2020 |
| 64 | BLGTC104-B1      | granite                   |   | K-feldspar | 18.413 | 15.638 | 38.484 | granite         | Liu 2017   |
| 65 | BLG-XJ-B8        | granite                   |   | K-feldspar | 18.411 | 15.634 | 38.496 | granite         | Liu 2017   |
| 66 | BLG-XJ-B9        | granite                   |   | K-feldspar | 18.429 | 15.633 | 38.473 | granite         | Liu 2017   |
| 67 | WLG-02-B01       | granite                   |   | K-feldspar | 18.593 | 15.632 | 38.436 | granite         | Liu 2017   |
| 68 | WLG-03-B01       | granite                   |   | K-feldspar | 18.561 | 15.630 | 38.423 | granite         | Liu 2017   |
| 69 | WLG-09-B01       | granite                   |   | K-feldspar | 18.488 | 15.628 | 38.443 | granite         | Liu 2017   |
| 70 | WLG-19-B1        | granite                   |   | K-feldspar | 18.429 | 15.615 | 38.519 | granite         | Liu 2017   |
| 71 | HLG-03-B1        | granite                   |   | K-feldspar | 18.789 | 15.643 | 38.957 | granite         | Liu 2017   |
| 72 | HTG-03-B1        | granodiorite              |   | K-feldspar | 18.249 | 15.608 | 38.211 | granodiorite    | Liu 2017   |
| 73 | WLG-14-B01       | Jinshuikou group gneiss   |   | bulk rock  | 18.758 | 15.652 | 38.459 | 215Ma-corrected | Liu 2017   |
| 74 | WLG-15-B01       | Jinshuikou group gneiss   |   | bulk rock  | 18.149 | 15.609 | 38.279 | 215Ma-corrected | Liu 2017   |
| 75 | WLG-16-B01       | Jinshuikou group gneiss   |   | bulk rock  | 18.413 | 15.636 | 38.298 | 215Ma-corrected | Liu 2017   |
| 76 | WLG-17-B01       | Jinshuikou group gneiss   |   | bulk rock  | 18.533 | 16.629 | 38.407 | 215Ma-corrected | Liu 2017   |
| 77 | WLG-18-B01       | Jinshuikou group gneiss   |   | bulk rock  | 18.540 | 15.623 | 38.441 | 215Ma-corrected | Liu 2017   |
| 78 | DHG-01-B3        | Xiaomiao formation gneiss |   | bulk rock  | 19.378 | 15.689 | 37.995 | 215Ma-corrected | Liu 2017   |
| 79 | DHG-02-B1        | Xiaomiao formation gneiss |   | bulk rock  | 18.540 | 15.643 | 38.248 | 215Ma-corrected | Liu 2017   |
| 80 | DHG-03-B1        | Xiaomiao formation gneiss |   | bulk rock  | 19.113 | 15.683 | 38.381 | 215Ma-corrected | Liu 2017   |
| 81 | DHG-04-B1        | Xiaomiao formation gneiss |   | bulk rock  | 18.632 | 15.653 | 38.302 | 215Ma-corrected | Liu 2017   |
| 82 | DHG-05-B1        | Xiaomiao formation gneiss |   | bulk rock  | 18.713 | 15.647 | 38.208 | 215Ma-corrected | Liu 2017   |
| 83 | BLG-03-B01       | Jinshuikou group gneiss   |   | bulk rock  | 18.443 | 15.614 | 38.376 | 215Ma-corrected | Liu 2017   |
| 84 | BLG-02-B01       | Jinshuikou group marble   |   | bulk rock  | 18.017 | 15.586 | 38.145 | 215Ma-corrected | Liu 2017   |
| 85 | HLG-07-B01       | slate                     |   | bulk rock  | 17.973 | 15.610 | 37.722 | 215Ma-corrected | Liu 2017   |
| 86 | HLG-08-B02       | slate                     |   | bulk rock  | 18.571 | 15.649 | 38.452 | 215Ma-corrected | Liu 2017   |
| 87 | HSGCM56-1-B01    | carbonaceous slate        |   | bulk rock  | 18.652 | 15.700 | 39.045 | 215Ma-corrected | Liu 2017   |
| 88 | HSGCM56-1-B02    | carbonaceous slate        |   | bulk rock  | 18.470 | 15.700 | 38.777 | 215Ma-corrected | Liu 2017   |
| 89 | HSGCM56-1-B03    | marble                    |   | bulk rock  | 18.164 | 15.616 | 38.309 | 215Ma-corrected | Liu 2017   |
| 90 | HSGCM64-2-B01    | carbonaceous slate        |   | bulk rock  | 19.107 | 15.789 | 39.432 | 215Ma-corrected | Liu 2017   |
| 91 | HSGCM64-2-B02    | carbonaceous slate        |   | bulk rock  | 18.563 | 15.704 | 38.085 | 215Ma-corrected | Liu 2017   |
| 92 | HSGCM64-2-B03    | marble                    |   | bulk rock  | 18.244 | 15.605 | 38.344 | 215Ma-corrected | Liu 2017   |

|    |               |        |           |        |        |        |                 |          |
|----|---------------|--------|-----------|--------|--------|--------|-----------------|----------|
| 93 | HSGCM64-2-B04 | marble | bulk rock | 18.008 | 15.604 | 38.125 | 215Ma-corrected | Liu 2017 |
| 94 | XI-42-B02     | slate  | bulk rock | 18.542 | 15.631 | 38.384 | 215Ma-corrected | Liu 2017 |

---
